# Supplementary material for: NO3− anions can act as Lewis acid in the solid state
Source: PubMed Central journal article supplement (PMC5321794; doi:10.1038/ncomms14522), 2017-02-21
Supplement: ncomms14522-s1.pdf [file ncomms14522-s1.pdf]

## Supplementary Note 1

For our initial calculations the cyanamide cation seemed an ideal candidate for two reasons: its positive charge would complement the negative charge in **2** while leaving some electron density on N, and its  $C_{3v}$  symmetry renders the computations more economical.

As is summarized in entries 1-3 in Supplementary Table 1, the complexation energies for all three cyanamide structures are negative and fairly large (comparable to hydrogen bonding). This large enthalpy might depend significantly on simple charge compensation. As a matter of fact, the interaction energy of host **2a** with the cyanamide molecule flipped 180 degrees (so that the  $-NH_3^+$  and nitrile N-atoms switch position, i.e. [**2a**··· $N^+H_3-C\equiv N$ ], not shown in the table) is  $-47.7$  kcal/mol. This is nearly identical to the interaction energy of complex [**2a**··· $N\equiv C-N^+H_3$ ] (entry 1,  $-48.8$  kcal/mol), thus confirming that the nature of the interaction is predominantly charge compensation. Interestingly, the least stable of these complexes involves **2c**, which actually had a positive potential on the nitrate's N-atom (see Figure 2b). This implies that the energy gain of charge compensation is largely counteracted by repulsion between the  $\pi$ -hole and the cyanamide cation.

Next we considered the charge neutral species acetonitrile and hydrogen cyanide as electron rich partners for the  $\pi$ -hole in **2c** (entries 4 and 5 in Supplementary Table 1). Interestingly, the estimated binding enthalpies of these 'pseudo anti-electrostatic' complexes are negative and in the order of weak hydrogen bonding (up to  $-7.7$  kcal/mol for [**2c**··· $N\equiv CCH_3$ ] $^-$ ).

Stimulated by these findings, we wondered how cyanide, chloride and  $BF_4^-$  anions would interact with the  $\pi$ -hole in **2c** and if perhaps truly 'anti-electrostatic' complexes might be obtained. To our surprise these complexes (entries 6, 7 and 8 in Supplementary Table 1) converged with their initial  $C_{3v}$  symmetry intact to give quite large and negative energies:  $-20.7$  kcal/mol for [**2c**··· $NC$ ] $^{2-}$ ,  $-31.6$  kcal/mol for [**2c**··· $Cl$ ] $^{2-}$  and  $-8.2$  kcal/mol for [**2c**··· $BF_4$ ] $^{2-}$ . Such enthalpies are comparable to medium to strong hydrogen bonding. Unsurprisingly, when considering **2a** as partner to these anions (entries 9, 10 and 11 in Supplementary Table 1), the computed enthalpies were fairly large but positive.

An 'atoms-in-molecules' analysis of all complexes (see Supplementary Figures 1 and 2) indicate a single bond critical point between the nitrate's N-atom and the interacting electronegative atom.

**Supplementary Table 1.** Overview of some characteristics of complexes involving **2** with  $C_{3v}$  symmetry as computed with the DFT paradigm at the BP86-D3/def2-TZVP level of theory.

| Entry | Host      | Guest                        | $\Delta E$<br>(kcal/mol) | Distance<br>(Å) | $10^2 \times \rho$<br>(a.u.) |
|-------|-----------|------------------------------|--------------------------|-----------------|------------------------------|
| 1     | <b>2a</b> | +NH <sub>3</sub> CN          | -48.8                    | 2.719           | 1.28                         |
| 2     | <b>2b</b> |                              | -40.2                    | 2.783           | 1.11                         |
| 3     | <b>2c</b> |                              | -22.4                    | 2.972           | 0.73                         |
| 4     |           | CH <sub>3</sub> CN           | -7.7                     | 2.867           | 1.00                         |
| 5     |           | HCN                          | -5.7                     | 2.920           | 0.89                         |
| 6     |           | N≡C <sup>-</sup>             | -20.7                    | 2.649           | 1.70                         |
| 7     |           | Cl <sup>-</sup>              | -31.6                    | 2.943           | 1.43                         |
| 8     |           | BF <sub>4</sub> <sup>-</sup> | -8.2                     | 2.472           | 1.75                         |
| 9     | <b>2a</b> | N≡C <sup>-</sup>             | +22.3                    | 2.728           | 1.45                         |
| 10    |           | Cl <sup>-</sup>              | +14.7                    | 2.997           | 1.28                         |
| 11    |           | BF <sub>4</sub> <sup>-</sup> | +28.6                    | 2.604           | 1.27                         |

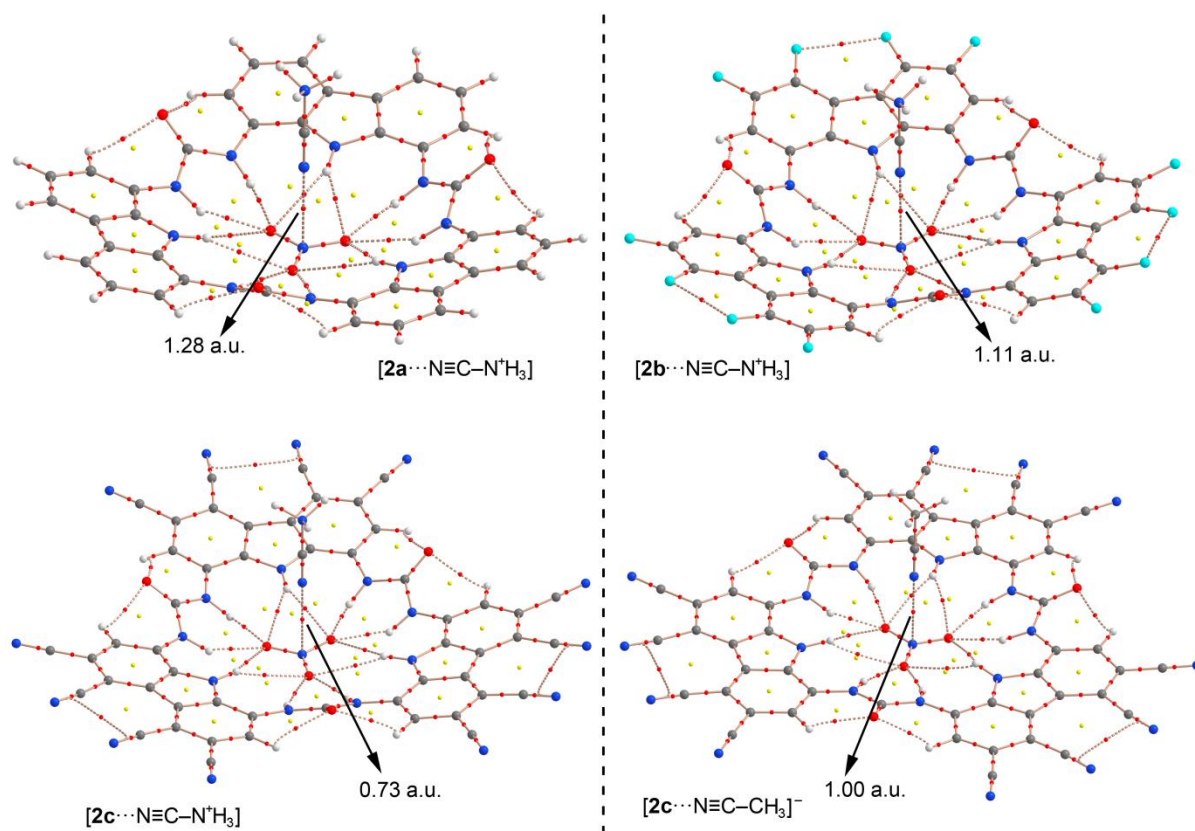

**Supplementary Figure 1.** Renderings of ‘atoms-in-molecules’ analyses of the complexes corresponding to entries **1** to **4** (Table S1). The charge density values ( $10^2 \times \rho$ , a.u.) at the bond CPs that characterize the  $\pi$ -hole interaction are given.

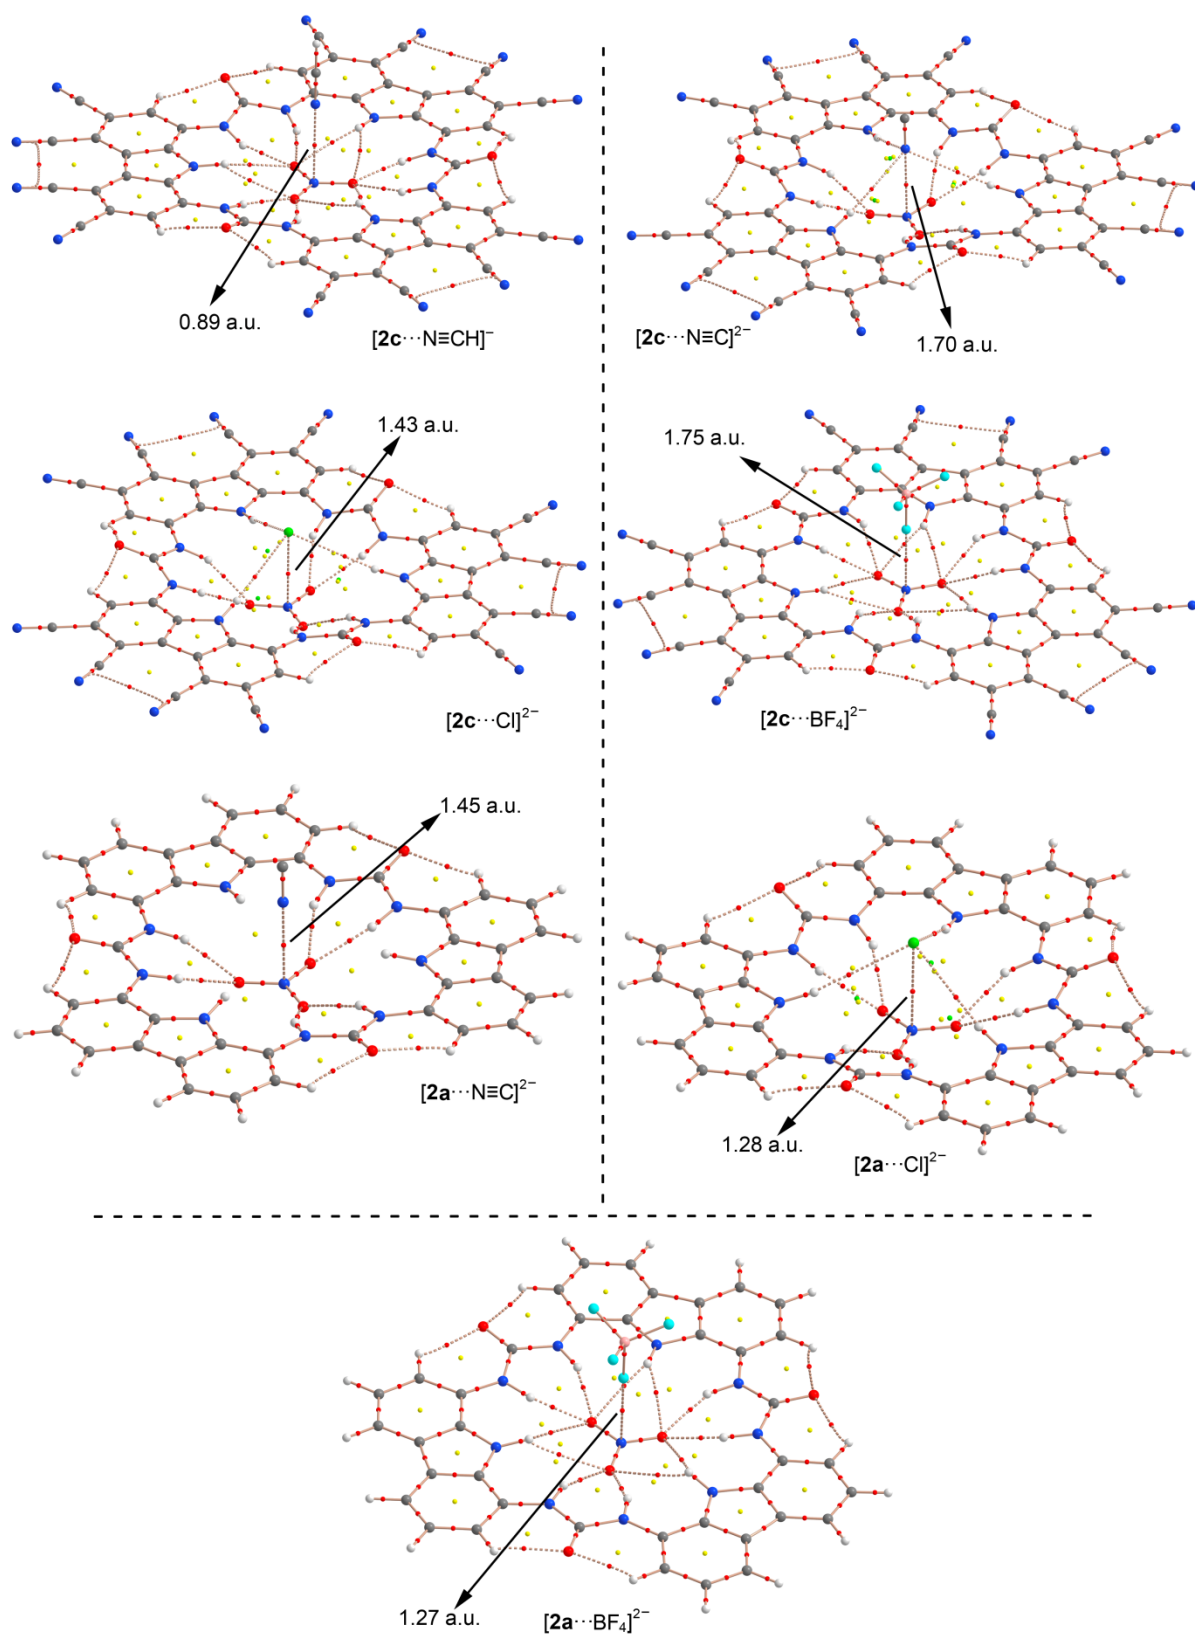

**Supplementary Figure 2.** Renderings of ‘atoms-in-molecules’ analyses of the complexes corresponding to entries **5** to **11** (Table S1). The charge density values ( $10^2 \times \rho$ , a.u.) at the bond CPs that characterize the  $\pi$ -hole interaction are given.

**Supplementary Table 2.** Numerical overview of the CSD and PDB data.

| <b>DB:</b> | <b>CU:</b>      | <b>Partner:</b>     | <b><math>N_{\text{struct.}}</math></b> | <b><math>N_{\text{total}}</math></b> | <b><math>N_{r\leq 1}</math></b> | <b><math>N_{\text{vdW}@r\leq 1}</math></b> | <b><math>N_{r3-4}</math></b> | <b><math>N_{\text{vdW}@r\leq 3-4}</math></b> |
|------------|-----------------|---------------------|----------------------------------------|--------------------------------------|---------------------------------|--------------------------------------------|------------------------------|----------------------------------------------|
| PDB        | NO <sub>3</sub> | N...O=C             | 1,560                                  | 20,058                               | 1,296                           | 266 (20.5%)                                | 5,940                        | 1,180 (19.9%)                                |
| PDB        | NO <sub>3</sub> | N...OH <sub>2</sub> | 1,437                                  | 24,218                               | 430                             | 86 (19.5%)                                 | 12,086                       | 7,312 (60.5%)                                |
| PDB        | NO <sub>3</sub> | N...SC              | 120                                    | 840                                  | 168                             | 36 (21.4%)                                 |                              |                                              |
| PDB        | NO <sub>3</sub> | N...SCC             | 56                                     | 354                                  | 48                              | 0 (0.0%)                                   |                              |                                              |
| CSD        | NO <sub>3</sub> | N...EIR             | 7,995                                  | 117,638 <sup>a</sup>                 | 5,540                           | 494 (8.9%)                                 | 47,850                       | 28 (0.06%)                                   |
| CSD        | NO <sub>3</sub> | N...O=X             | 5,787                                  | 26,364                               | 1,937                           | 327 (16.9%)                                |                              |                                              |
| CSD        | NO <sub>3</sub> | N...OH <sub>2</sub> | 2,649                                  | 10,526                               | 91                              | 11 (12.0%)                                 | 7,406                        | 2 (0.03%)                                    |
| CSD        | NO <sub>3</sub> | N...S               | 732                                    | 2,139                                | 167                             | 22 (13.2%)                                 |                              |                                              |

a) 'EIR' stands for 'electron rich and the data consists of EIR = N (89,845), O (53,504), F (433), P (470), S (2,071), Cl (999), As (33), Se (33), Br (186), Te (21) and I (43).

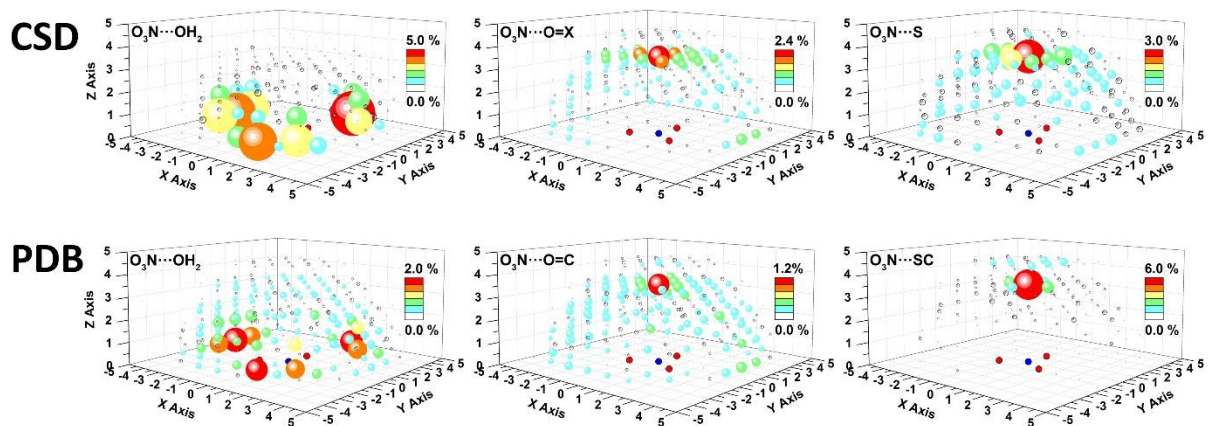

**Supplementary Figure 3.** Four dimensional (4D) density plots of the CSD/PDB data found within the 10 Å wide and 5 Å high hemisphere.

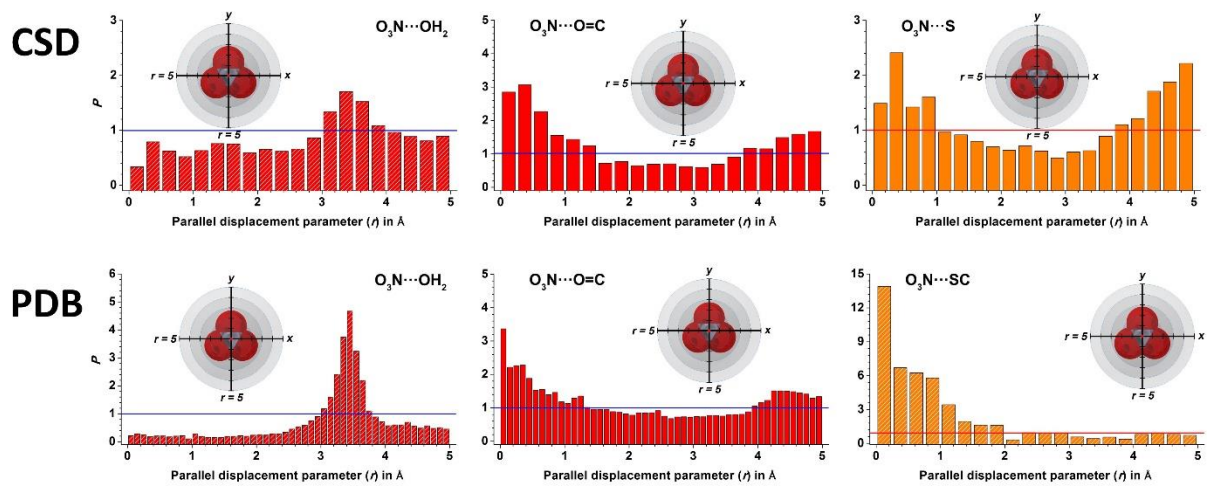

**Supplementary Figure 4.** Directionality plots  $P(r)$  of the data CSD/PDB data found within the 10 Å wide and 5 Å high hemisphere.

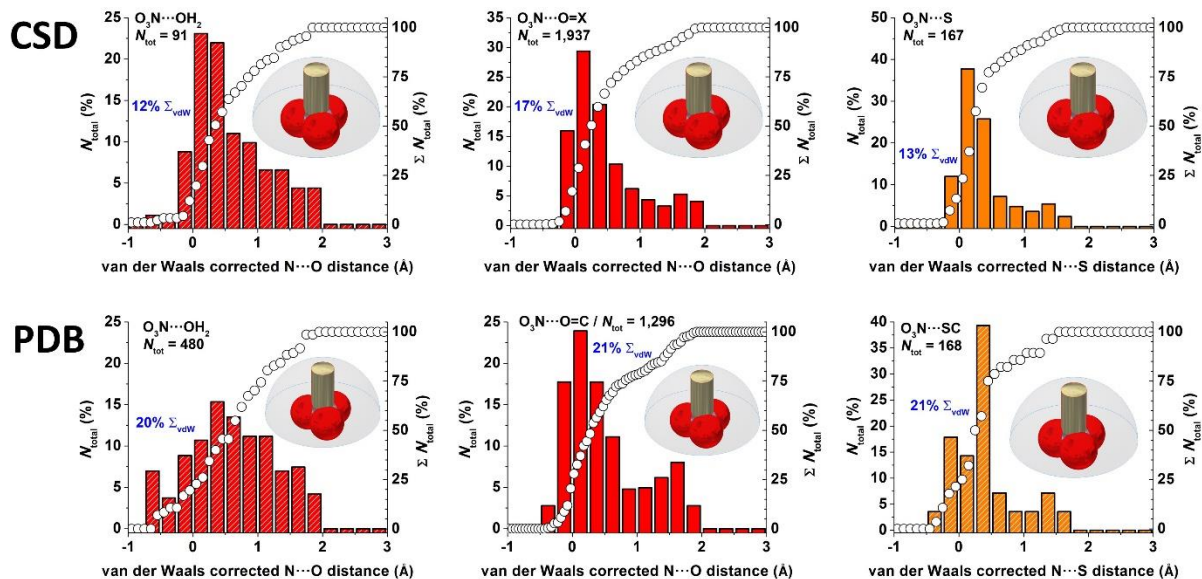

**Supplementary Figure 5.** Distribution of the van der Waals corrected <sup>nitrate</sup>N $\cdots$ O/S distances within a spherical segment with base radius of 1 Å located within the 10 Å wide and 5 Å high hemisphere studied herein (gold in inset figures).



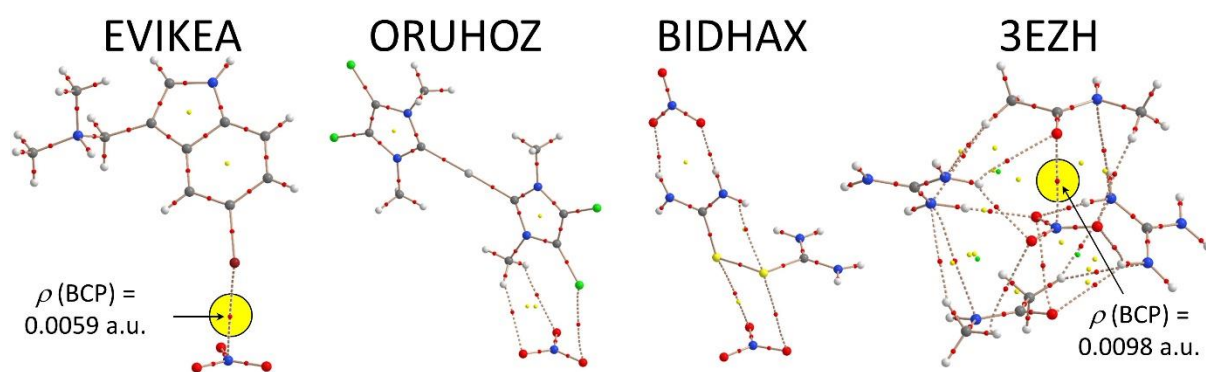

**Supplementary Figure 6.** Renderings of 'atoms-in-molecules' analyses of the computed fragments of EVIKEA, ORUHOZ and BIDHAX (see also Figure 4).

## Supplementary Note 2

The Natural Bond Orbital analysis (with a focus on second order perturbation) revealed the following donor-acceptor interactions:

EVIKEA,  $LP_{Br} \rightarrow LP^*_N$ ,  $E^{(2)} = 0.51$  kcal/mol;

ORUHOZ,  $LP_{Cl} \rightarrow \pi^*_{NO_3}$ ,  $E^{(2)} = 0.24$  kcal/mol;

BIDHAX,  $LP_S \rightarrow \pi^*_{NO_3}$ ,  $E^{(2)} = 0.12$  kcal/mol,  $LP_{S-S} \rightarrow Ry^*_N$ ,  $E^{(2)} = 0.24$  kcal/mol;

3EZHZ,  $LP_{C=O} \rightarrow \pi^*_{NO_3}$ ,  $E^{(2)} = 0.34$  kcal/mol,  $LP_{C=O} \rightarrow Ry^*_N$ ,  $E^{(2)} = 0.13$  kcal/mol.

## Supplementary Note 3

After some deliberation we could not think of a single (common) anion with the combined properties of  $NO_3^-$ , i.e.: fairly polarized and further polarizable, not so charge-dense, and flat, i.e.  $\pi$ -hole is sterically accessible. The halides are easily dismissed (point charge) and most other common anions are not flat and sterically too crowded to allow the approach of a Lewis base (e.g.  $ClO_3^-$ ,  $BrO_3^-$ ,  $ClO_4^-$ ,  $BrO_4^-$ ,  $BF_4^-$ ,  $PF_6^-$ ). Anions with two or more charges such as  $CO_3^{2-}$  are likely too charge dense. Flat anions such as  $NO_2^-$ ,  $N_3^-$  and  $CN^-$  do not seem to be polarized enough and thus also too charge dense, i.e. the maximum potentials are respectively is  $-132$ ,  $-142$  and  $-145$  kcal/mol versus  $-110$  kcal/mol for  $NO_3^-$  (MP2/6-311+G\*\*). They are also intrinsically more charge dense with an atom over charge ratio of 3 ( $NO_2^-$ ,  $N_3^-$ ) or 2 ( $CN^-$ ) versus 4 of nitrate. We also contemplated trifluoroacetate but the maximum potentials (maximum actually lies on the  $\sigma$ -hole of  $-CF_3$ ) are sterically less accessible. A promising candidate might be the rare  $FCO_2^-$  (similar MEP as nitrate, only one structure in the CSD and none in the PDB), but this anion is very likely to decompose to  $F^-$  and  $CO_2$ .  $I_3^-$  (and possibly  $Hlg_3^-$  generally) can act as a halogen bond donor but is also prone to decomposition into  $I^-$  and  $I_2$  (P. H. Svensson and L. Kloo, *Chemical Reviews*, **2003**, *103*, 1649-1684; at the MP2/6-311+G\*\* level of theory two latent  $\sigma$ -holes are present on  $I_3^-$  ( $-76$  kcal/mol),  $Br_3^-$  ( $-87$  kcal/mol) and  $Cl_3^-$  ( $-97$  kcal/mol)).

**Supplementary Table 3.** Cartesian coordinates of computed complexes.

**2a**

|   |            |            |           |
|---|------------|------------|-----------|
| C | 5.3638114  | -3.4363870 | 0.0000000 |
| C | 6.7085655  | -3.0242613 | 0.0000000 |
| C | 7.0650630  | -1.6800364 | 0.0000000 |
| C | 6.0395387  | -0.7231499 | 0.0000000 |
| C | 4.6822073  | -1.1351474 | 0.0000000 |
| C | 4.3188586  | -2.5014614 | 0.0000000 |
| C | 6.0395387  | 0.7231499  | 0.0000000 |
| C | 4.6822073  | 1.1351474  | 0.0000000 |
| N | 3.8730678  | 0.0000000  | 0.0000000 |
| C | 7.0650630  | 1.6800364  | 0.0000000 |
| C | 6.7085655  | 3.0242613  | 0.0000000 |
| C | 5.3638114  | 3.4363870  | 0.0000000 |
| C | 4.3188586  | 2.5014614  | 0.0000000 |
| N | 2.9544491  | 2.8229008  | 0.0000000 |
| C | 2.3567360  | 4.0819866  | 0.0000000 |
| O | 2.9706882  | 5.1453828  | 0.0000000 |
| N | 0.9674792  | 3.9700784  | 0.0000000 |
| H | 5.1096314  | -4.4921733 | 0.0000000 |
| H | 7.4841208  | -3.7917815 | 0.0000000 |
| H | 8.1111494  | -1.3716519 | 0.0000000 |
| H | 2.8570966  | 0.0000000  | 0.0000000 |
| H | 8.1111494  | 1.3716519  | 0.0000000 |
| H | 7.4841208  | 3.7917815  | 0.0000000 |
| H | 5.1096314  | 4.4921733  | 0.0000000 |
| H | 2.3168711  | 2.0303412  | 0.0000000 |
| H | 0.5998915  | 3.0216398  | 0.0000000 |
| C | 0.2940927  | 6.3633904  | 0.0000000 |
| C | -0.7351956 | 7.3219189  | 0.0000000 |
| C | -2.0775773 | 6.9585423  | 0.0000000 |
| C | -2.3935031 | 5.5919689  | 0.0000000 |
| C | -1.3580372 | 4.6224841  | 0.0000000 |
| C | 0.0068998  | 4.9909720  | 0.0000000 |
| C | -3.6460356 | 4.8688190  | 0.0000000 |
| C | -3.3241701 | 3.4873367  | 0.0000000 |
| N | -1.9365339 | 3.3541751  | 0.0000000 |
| C | -4.9874857 | 5.2785058  | 0.0000000 |
| C | -5.9733699 | 4.2976575  | 0.0000000 |
| C | -5.6579041 | 2.9270035  | 0.0000000 |
| C | -4.3257584 | 2.4895106  | 0.0000000 |
| N | -3.9219284 | 1.1471776  | 0.0000000 |
| C | -4.7134721 | 0.0000000  | 0.0000000 |
| O | -5.9413763 | 0.0000000  | 0.0000000 |
| N | -3.9219284 | -1.1471776 | 0.0000000 |
| H | 1.3355205  | 6.6711572  | 0.0000000 |

|   |            |            |           |
|---|------------|------------|-----------|
| H | -0.4582813 | 8.3773295  | 0.0000000 |
| H | -2.8676893 | 7.7102874  | 0.0000000 |
| H | -1.4285483 | 2.4743183  | 0.0000000 |
| H | -5.2434601 | 6.3386355  | 0.0000000 |
| H | -7.0258395 | 4.5855479  | 0.0000000 |
| H | -6.4451519 | 2.1789839  | 0.0000000 |
| H | -2.9167626 | 0.9912986  | 0.0000000 |
| H | -2.9167626 | -0.9912986 | 0.0000000 |
| C | -5.6579041 | -2.9270035 | 0.0000000 |
| C | -5.9733699 | -4.2976575 | 0.0000000 |
| C | -4.9874857 | -5.2785058 | 0.0000000 |
| C | -3.6460356 | -4.8688190 | 0.0000000 |
| C | -3.3241701 | -3.4873367 | 0.0000000 |
| C | -4.3257584 | -2.4895106 | 0.0000000 |
| C | -2.3935031 | -5.5919689 | 0.0000000 |
| C | -1.3580372 | -4.6224841 | 0.0000000 |
| N | -1.9365339 | -3.3541751 | 0.0000000 |
| C | -2.0775773 | -6.9585423 | 0.0000000 |
| C | -0.7351956 | -7.3219189 | 0.0000000 |
| C | 0.2940927  | -6.3633904 | 0.0000000 |
| C | 0.0068998  | -4.9909720 | 0.0000000 |
| N | 0.9674792  | -3.9700784 | 0.0000000 |
| C | 2.3567360  | -4.0819866 | 0.0000000 |
| O | 2.9706882  | -5.1453828 | 0.0000000 |
| N | 2.9544491  | -2.8229008 | 0.0000000 |
| H | -6.4451519 | -2.1789839 | 0.0000000 |
| H | -7.0258395 | -4.5855479 | 0.0000000 |
| H | -5.2434601 | -6.3386355 | 0.0000000 |
| H | -1.4285483 | -2.4743183 | 0.0000000 |
| H | -2.8676893 | -7.7102874 | 0.0000000 |
| H | -0.4582813 | -8.3773295 | 0.0000000 |
| H | 1.3355205  | -6.6711572 | 0.0000000 |
| H | 0.5998915  | -3.0216398 | 0.0000000 |
| H | 2.3168711  | -2.0303412 | 0.0000000 |
| N | -0.0000000 | 0.0000000  | 0.0000000 |
| O | 0.6299835  | 1.0911634  | 0.0010000 |
| O | 0.6299835  | -1.0911634 | 0.0010000 |
| O | -1.2599670 | 0.0000000  | 0.0010000 |

**2b**

|   |           |            |           |
|---|-----------|------------|-----------|
| C | 5.3390898 | -3.4461727 | 0.0000000 |
| C | 6.6752365 | -3.0382865 | 0.0000000 |
| C | 7.0527565 | -1.7020898 | 0.0000000 |
| C | 6.0503601 | -0.7224723 | 0.0000000 |
| C | 4.6897754 | -1.1360228 | 0.0000000 |
| C | 4.3106108 | -2.4974785 | 0.0000000 |
| C | 6.0503601 | 0.7224723  | 0.0000000 |

|   |            |            |           |
|---|------------|------------|-----------|
| C | 4.6897754  | 1.1360228  | 0.0000000 |
| N | 3.8859208  | 0.0000000  | 0.0000000 |
| C | 7.0527565  | 1.7020898  | 0.0000000 |
| C | 6.6752365  | 3.0382865  | 0.0000000 |
| C | 5.3390898  | 3.4461727  | 0.0000000 |
| C | 4.3106108  | 2.4974785  | 0.0000000 |
| N | 2.9455959  | 2.8084565  | 0.0000000 |
| C | 2.3478163  | 4.0665370  | 0.0000000 |
| O | 2.9615581  | 5.1295691  | 0.0000000 |
| N | 0.9593967  | 3.9551891  | 0.0000000 |
| H | 5.1044272  | -4.5066372 | 0.0000000 |
| H | 2.8701710  | 0.0000000  | 0.0000000 |
| H | 5.1044272  | 4.5066372  | 0.0000000 |
| H | 2.3109717  | 2.0136731  | 0.0000000 |
| H | 0.5884062  | 3.0081968  | 0.0000000 |
| C | 0.3149282  | 6.3468737  | 0.0000000 |
| C | -0.7063850 | 7.3000676  | 0.0000000 |
| C | -2.0523252 | 6.9589112  | 0.0000000 |
| C | -2.3995007 | 5.6010017  | 0.0000000 |
| C | -1.3610631 | 4.6294760  | 0.0000000 |
| C | 0.0075744  | 4.9818377  | 0.0000000 |
| C | -3.6508594 | 4.8785294  | 0.0000000 |
| C | -3.3287123 | 3.4934533  | 0.0000000 |
| N | -1.9429604 | 3.3653062  | 0.0000000 |
| C | -5.0004313 | 5.2568214  | 0.0000000 |
| C | -5.9688515 | 4.2617811  | 0.0000000 |
| C | -5.6540180 | 2.9007010  | 0.0000000 |
| C | -4.3181852 | 2.4843592  | 0.0000000 |
| N | -3.9049926 | 1.1467326  | 0.0000000 |
| C | -4.6956325 | 0.0000000  | 0.0000000 |
| O | -5.9231162 | 0.0000000  | 0.0000000 |
| N | -3.9049926 | -1.1467326 | 0.0000000 |
| H | 1.3506487  | 6.6738822  | 0.0000000 |
| H | -1.4350855 | 2.4856410  | 0.0000000 |
| H | -6.4550759 | 2.1672450  | 0.0000000 |
| H | -2.8993779 | 0.9945237  | 0.0000000 |
| H | -2.8993779 | -0.9945237 | 0.0000000 |
| C | -5.6540180 | -2.9007010 | 0.0000000 |
| C | -5.9688515 | -4.2617811 | 0.0000000 |
| C | -5.0004313 | -5.2568214 | 0.0000000 |
| C | -3.6508594 | -4.8785294 | 0.0000000 |
| C | -3.3287123 | -3.4934533 | 0.0000000 |
| C | -4.3181852 | -2.4843592 | 0.0000000 |
| C | -2.3995007 | -5.6010017 | 0.0000000 |
| C | -1.3610631 | -4.6294760 | 0.0000000 |
| N | -1.9429604 | -3.3653062 | 0.0000000 |
| C | -2.0523252 | -6.9589112 | 0.0000000 |

|   |            |            |           |
|---|------------|------------|-----------|
| C | -0.7063850 | -7.3000676 | 0.0000000 |
| C | 0.3149282  | -6.3468737 | 0.0000000 |
| C | 0.0075744  | -4.9818377 | 0.0000000 |
| N | 0.9593967  | -3.9551891 | 0.0000000 |
| C | 2.3478163  | -4.0665370 | 0.0000000 |
| O | 2.9615581  | -5.1295691 | 0.0000000 |
| N | 2.9455959  | -2.8084565 | 0.0000000 |
| H | -6.4550759 | -2.1672450 | 0.0000000 |
| H | -1.4350855 | -2.4856410 | 0.0000000 |
| H | 1.3506487  | -6.6738822 | 0.0000000 |
| H | 0.5884062  | -3.0081968 | 0.0000000 |
| H | 2.3109717  | -2.0136731 | 0.0000000 |
| N | -0.0000000 | 0.0000000  | 0.0000000 |
| O | 0.6297742  | 1.0908009  | 0.0000000 |
| O | 0.6297742  | -1.0908009 | 0.0000000 |
| O | -1.2595483 | 0.0000000  | 0.0000000 |
| F | 7.6450679  | 3.9892877  | 0.0000000 |
| F | 8.3620686  | 1.3736855  | 0.0000000 |
| F | 8.3620686  | -1.3736855 | 0.0000000 |
| F | 7.6450679  | -3.9892877 | 0.0000000 |
| F | -0.3677095 | -8.6154669 | 0.0000000 |
| F | -2.9913877 | -7.9286066 | 0.0000000 |
| F | -5.3706809 | -6.5549211 | 0.0000000 |
| F | -7.2773584 | -4.6261792 | 0.0000000 |
| F | -7.2773584 | 4.6261792  | 0.0000000 |
| F | -5.3706809 | 6.5549211  | 0.0000000 |
| F | -2.9913877 | 7.9286066  | 0.0000000 |
| F | -0.3677095 | 8.6154669  | 0.0000000 |

## 2c

|   |           |            |           |
|---|-----------|------------|-----------|
| C | 5.2939769 | -3.4547115 | 0.0000000 |
| C | 6.6514832 | -3.0917641 | 0.0000000 |
| C | 7.0809109 | -1.7407868 | 0.0000000 |
| C | 6.0858125 | -0.7296262 | 0.0000000 |
| C | 4.7177623 | -1.1304292 | 0.0000000 |
| C | 4.2945870 | -2.4816845 | 0.0000000 |
| C | 6.0858125 | 0.7296262  | 0.0000000 |
| C | 4.7177623 | 1.1304292  | 0.0000000 |
| N | 3.9195503 | 0.0000000  | 0.0000000 |
| C | 7.0809109 | 1.7407868  | 0.0000000 |
| C | 6.6514832 | 3.0917641  | 0.0000000 |
| C | 5.2939769 | 3.4547115  | 0.0000000 |
| C | 4.2945870 | 2.4816845  | 0.0000000 |
| N | 2.9279431 | 2.7637521  | 0.0000000 |
| C | 2.3238589 | 4.0250417  | 0.0000000 |
| O | 2.9346637 | 5.0829866  | 0.0000000 |
| N | 0.9295080 | 3.9175491  | 0.0000000 |

|   |            |            |           |
|---|------------|------------|-----------|
| H | 5.0196796  | -4.5043806 | 0.0000000 |
| H | 2.9034588  | 0.0000000  | 0.0000000 |
| H | 5.0196796  | 4.5043806  | 0.0000000 |
| H | 2.2971056  | 1.9650605  | 0.0000000 |
| H | 0.5532395  | 2.9718821  | 0.0000000 |
| C | 0.3448794  | 6.3120743  | 0.0000000 |
| C | -0.6481953 | 7.3062355  | 0.0000000 |
| C | -2.0328899 | 7.0026422  | 0.0000000 |
| C | -2.4110314 | 5.6352814  | 0.0000000 |
| C | -1.3799008 | 4.6509166  | 0.0000000 |
| C | 0.0019084  | 4.9600637  | 0.0000000 |
| C | -3.6747811 | 4.9056551  | 0.0000000 |
| C | -3.3378616 | 3.5204874  | 0.0000000 |
| N | -1.9597752 | 3.3944302  | 0.0000000 |
| C | -5.0480211 | 5.2618553  | 0.0000000 |
| C | -6.0032879 | 4.2144714  | 0.0000000 |
| C | -5.6388564 | 2.8573628  | 0.0000000 |
| C | -4.2964954 | 2.4783792  | 0.0000000 |
| N | -3.8574511 | 1.1537970  | 0.0000000 |
| C | -4.6477179 | 0.0000000  | 0.0000000 |
| O | -5.8693274 | 0.0000000  | 0.0000000 |
| N | -3.8574511 | -1.1537970 | 0.0000000 |
| H | 1.3910683  | 6.5993603  | 0.0000000 |
| H | -1.4517294 | 2.5144691  | 0.0000000 |
| H | -6.4107478 | 2.0949797  | 0.0000000 |
| H | -2.8503451 | 1.0068216  | 0.0000000 |
| H | -2.8503451 | -1.0068216 | 0.0000000 |
| C | -5.6388564 | -2.8573628 | 0.0000000 |
| C | -6.0032879 | -4.2144714 | 0.0000000 |
| C | -5.0480211 | -5.2618553 | 0.0000000 |
| C | -3.6747811 | -4.9056551 | 0.0000000 |
| C | -3.3378616 | -3.5204874 | 0.0000000 |
| C | -4.2964954 | -2.4783792 | 0.0000000 |
| C | -2.4110314 | -5.6352814 | 0.0000000 |
| C | -1.3799008 | -4.6509166 | 0.0000000 |
| N | -1.9597752 | -3.3944302 | 0.0000000 |
| C | -2.0328899 | -7.0026422 | 0.0000000 |
| C | -0.6481953 | -7.3062355 | 0.0000000 |
| C | 0.3448794  | -6.3120743 | 0.0000000 |
| C | 0.0019084  | -4.9600637 | 0.0000000 |
| N | 0.9295080  | -3.9175491 | 0.0000000 |
| C | 2.3238589  | -4.0250417 | 0.0000000 |
| O | 2.9346637  | -5.0829866 | 0.0000000 |
| N | 2.9279431  | -2.7637521 | 0.0000000 |
| H | -6.4107478 | -2.0949797 | 0.0000000 |
| H | -1.4517294 | -2.5144691 | 0.0000000 |
| H | 1.3910683  | -6.5993603 | 0.0000000 |

|   |            |            |           |
|---|------------|------------|-----------|
| H | 0.5532395  | -2.9718821 | 0.0000000 |
| H | 2.2971056  | -1.9650605 | 0.0000000 |
| N | -0.0000000 | 0.0000000  | 0.0000000 |
| O | 0.6290045  | 1.0894678  | 0.0000000 |
| O | 0.6290045  | -1.0894678 | 0.0000000 |
| O | -1.2580091 | 0.0000000  | 0.0000000 |
| C | 7.6117718  | 4.1508676  | 0.0000000 |
| C | 8.4890263  | 1.5371675  | 0.0000000 |
| C | 8.4890263  | -1.5371675 | 0.0000000 |
| C | 7.6117718  | -4.1508676 | 0.0000000 |
| C | -0.2111291 | -8.6674215 | 0.0000000 |
| C | -2.9132870 | -8.1202962 | 0.0000000 |
| C | -5.5757393 | -6.5831286 | 0.0000000 |
| C | -7.4006427 | -4.5165540 | 0.0000000 |
| C | -7.4006427 | 4.5165540  | 0.0000000 |
| C | -5.5757393 | 6.5831286  | 0.0000000 |
| C | -2.9132870 | 8.1202962  | 0.0000000 |
| C | -0.2111291 | 8.6674215  | 0.0000000 |
| N | 0.1886199  | -9.7617700 | 0.0000000 |
| N | -3.5069753 | -9.1233231 | 0.0000000 |
| N | -6.1475419 | -7.5987913 | 0.0000000 |
| N | -8.5482508 | -4.7175354 | 0.0000000 |
| N | -8.5482508 | 4.7175354  | 0.0000000 |
| N | -6.1475419 | 7.5987913  | 0.0000000 |
| N | -3.5069753 | 9.1233231  | 0.0000000 |
| N | 0.1886199  | 9.7617700  | 0.0000000 |
| N | 8.3596309  | 5.0442346  | 0.0000000 |
| N | 9.6545172  | 1.5245318  | 0.0000000 |
| N | 9.6545172  | -1.5245318 | 0.0000000 |
| N | 8.3596309  | -5.0442346 | 0.0000000 |

[2a...N≡C-N<sup>+</sup>H<sub>3</sub>]

|   |            |            |            |
|---|------------|------------|------------|
| C | -5.2914303 | 3.4327112  | -0.1394568 |
| C | -6.6081970 | 3.0333374  | 0.1462972  |
| C | -6.9714754 | 1.6892419  | 0.1981552  |
| C | -5.9831730 | 0.7236951  | -0.0363193 |
| C | -4.6520885 | 1.1309190  | -0.3151502 |
| C | -4.2854641 | 2.4862797  | -0.3741903 |
| C | -5.9831730 | -0.7236951 | -0.0363193 |
| C | -4.6520885 | -1.1309190 | -0.3151502 |
| N | -3.8561606 | 0.0000000  | -0.4760614 |
| C | -6.9714754 | -1.6892419 | 0.1981552  |
| C | -6.6081970 | -3.0333374 | 0.1462972  |
| C | -5.2914303 | -3.4327112 | -0.1394568 |
| C | -4.2854641 | -2.4862797 | -0.3741903 |
| N | -2.9516064 | -2.8094672 | -0.6751942 |
| C | -2.2704660 | -3.9325624 | -0.2179864 |



|   |            |            |            |
|---|------------|------------|------------|
| O | -2.7651713 | -4.7894172 | 0.5077253  |
| N | -0.9572668 | -3.9608997 | -0.6751942 |
| H | -5.0329564 | 4.4875758  | -0.1659894 |
| H | -7.3590329 | 3.8041811  | 0.3232851  |
| H | -7.9972332 | 1.3919154  | 0.4176196  |
| H | -2.8678459 | 0.0000000  | -0.7177057 |
| H | -7.9972332 | -1.3919154 | 0.4176196  |
| H | -7.3590329 | -3.8041811 | 0.3232851  |
| H | -5.0329564 | -4.4875758 | -0.1659894 |
| H | -2.4118256 | -2.1140801 | -1.1893006 |
| H | -0.6249343 | -3.1457423 | -1.1893006 |
| C | -0.3271000 | -6.2988686 | -0.1394568 |
| C | 0.6771512  | -7.2395352 | 0.1462972  |
| C | 2.0228113  | -6.8820957 | 0.1981552  |
| C | 2.3648482  | -5.5434274 | -0.0363193 |
| C | 1.3466397  | -4.5942863 | -0.3151502 |
| C | -0.0104493 | -4.9544607 | -0.3741903 |
| C | 3.6183248  | -4.8197323 | -0.0363193 |
| C | 3.3054488  | -3.4633673 | -0.3151502 |
| N | 1.9280803  | -3.3395331 | -0.4760614 |
| C | 4.9486641  | -5.1928539 | 0.1981552  |
| C | 5.9310458  | -4.2061978 | 0.1462972  |
| C | 5.6185302  | -2.8661574 | -0.1394568 |
| C | 4.2959135  | -2.4681810 | -0.3741903 |
| N | 3.9088731  | -1.1514325 | -0.6751942 |
| C | 4.5409319  | 0.0000000  | -0.2179864 |
| O | 5.5303426  | 0.0000000  | 0.5077253  |
| N | 3.9088731  | 1.1514325  | -0.6751942 |
| H | -1.3698764 | -6.6024560 | -0.1659894 |
| H | 0.3849990  | -8.2752000 | 0.3232851  |
| H | 2.7931825  | -7.6217648 | 0.4176196  |
| H | 1.4339229  | -2.4836274 | -0.7177057 |
| H | 5.2040507  | -6.2298494 | 0.4176196  |
| H | 6.9740339  | -4.4710189 | 0.3232851  |
| H | 6.4028329  | -2.1148802 | -0.1659894 |
| H | 3.0367599  | -1.0316622 | -1.1893006 |
| H | 3.0367599  | 1.0316622  | -1.1893006 |
| C | 5.6185302  | 2.8661574  | -0.1394568 |
| C | 5.9310458  | 4.2061978  | 0.1462972  |
| C | 4.9486641  | 5.1928539  | 0.1981552  |
| C | 3.6183248  | 4.8197323  | -0.0363193 |
| C | 3.3054488  | 3.4633673  | -0.3151502 |
| C | 4.2959135  | 2.4681810  | -0.3741903 |
| C | 2.3648482  | 5.5434274  | -0.0363193 |
| C | 1.3466397  | 4.5942863  | -0.3151502 |
| N | 1.9280803  | 3.3395331  | -0.4760614 |
| C | 2.0228113  | 6.8820957  | 0.1981552  |

|   |            |            |            |
|---|------------|------------|------------|
| C | 0.6771512  | 7.2395352  | 0.1462972  |
| C | -0.3271000 | 6.2988686  | -0.1394568 |
| C | -0.0104493 | 4.9544607  | -0.3741903 |
| N | -0.9572668 | 3.9608997  | -0.6751942 |
| C | -2.2704660 | 3.9325624  | -0.2179864 |
| O | -2.7651713 | 4.7894172  | 0.5077253  |
| N | -2.9516064 | 2.8094672  | -0.6751942 |
| H | 6.4028329  | 2.1148802  | -0.1659894 |
| H | 6.9740339  | 4.4710189  | 0.3232851  |
| H | 5.2040507  | 6.2298494  | 0.4176196  |
| H | 1.4339229  | 2.4836274  | -0.7177057 |
| H | 2.7931825  | 7.6217648  | 0.4176196  |
| H | 0.3849990  | 8.2752000  | 0.3232851  |
| H | -1.3698764 | 6.6024560  | -0.1659894 |
| H | -0.6249343 | 3.1457423  | -1.1893006 |
| H | -2.4118256 | 2.1140801  | -1.1893006 |
| N | 0.0000000  | 0.0000000  | -1.5338053 |
| O | -0.6314494 | -1.0937024 | -1.5199062 |
| O | -0.6314494 | 1.0937024  | -1.5199062 |
| O | 1.2628987  | 0.0000000  | -1.5199062 |
| N | 0.0000000  | 0.0000000  | 1.1850118  |
| C | 0.0000000  | 0.0000000  | 2.3452413  |
| H | -0.4881515 | 0.8455031  | 4.1267668  |
| H | -0.4881515 | -0.8455031 | 4.1267668  |
| H | 0.9763029  | 0.0000000  | 4.1267668  |
| N | 0.0000000  | 0.0000000  | 3.7565177  |

[2b...N≡C-N<sup>+</sup>H<sub>3</sub>]

|   |           |            |            |
|---|-----------|------------|------------|
| C | 5.2604226 | -3.4418179 | -0.1550882 |
| C | 6.5641499 | -3.0472654 | 0.1499425  |
| C | 6.9497318 | -1.7099973 | 0.1990322  |
| C | 5.9883832 | -0.7230505 | -0.0529820 |
| C | 4.6577099 | -1.1318226 | -0.3481464 |
| C | 4.2757028 | -2.4823367 | -0.4106593 |
| C | 5.9883832 | 0.7230505  | -0.0529820 |
| C | 4.6577099 | 1.1318226  | -0.3481464 |
| N | 3.8721548 | 0.0000000  | -0.5311224 |
| C | 6.9497318 | 1.7099973  | 0.1990322  |
| C | 6.5641499 | 3.0472654  | 0.1499425  |
| C | 5.2604226 | 3.4418179  | -0.1550882 |
| C | 4.2757028 | 2.4823367  | -0.4106593 |
| N | 2.9454124 | 2.7964593  | -0.7276229 |
| C | 2.2602787 | 3.9149175  | -0.2667166 |
| O | 2.7536475 | 4.7694574  | 0.4621726  |
| N | 0.9490986 | 3.9490316  | -0.7276229 |
| H | 5.0224059 | -4.5012146 | -0.1713131 |
| H | 2.8713044 | 0.0000000  | -0.7146953 |

|   |            |            |            |
|---|------------|------------|------------|
| H | 5.0224059  | 4.5012146  | -0.1713131 |
| H | 2.4136532  | 2.1001980  | -1.2486121 |
| H | 0.6119982  | 3.1403840  | -1.2486121 |
| C | 0.3504905  | 6.2765686  | -0.1550882 |
| C | -0.6430657 | 7.2083533  | 0.1499425  |
| C | -1.9939648 | 6.8736430  | 0.1990322  |
| C | -2.3680115 | 5.5476173  | -0.0529820 |
| C | -1.3486679 | 4.5996064  | -0.3481464 |
| C | 0.0119152  | 4.9440356  | -0.4106593 |
| C | -3.6203718 | 4.8245667  | -0.0529820 |
| C | -3.3090420 | 3.4677838  | -0.3481464 |
| N | -1.9360774 | 3.3533844  | -0.5311224 |
| C | -4.9557670 | 5.1636456  | 0.1990322  |
| C | -5.9210842 | 4.1610879  | 0.1499425  |
| C | -5.6109131 | 2.8347506  | -0.1550882 |
| C | -4.2876180 | 2.4616989  | -0.4106593 |
| N | -3.8945110 | 1.1525723  | -0.7276229 |
| C | -4.5205574 | 0.0000000  | -0.2667166 |
| O | -5.5072950 | 0.0000000  | 0.4621726  |
| N | -3.8945110 | -1.1525723 | -0.7276229 |
| H | 1.3869633  | 6.6001384  | -0.1713131 |
| H | -1.4356522 | 2.4866226  | -0.7146953 |
| H | -6.4093692 | 2.0989238  | -0.1713131 |
| H | -3.0256514 | 1.0401860  | -1.2486121 |
| H | -3.0256514 | -1.0401860 | -1.2486121 |
| C | -5.6109131 | -2.8347506 | -0.1550882 |
| C | -5.9210842 | -4.1610879 | 0.1499425  |
| C | -4.9557670 | -5.1636456 | 0.1990322  |
| C | -3.6203718 | -4.8245667 | -0.0529820 |
| C | -3.3090420 | -3.4677838 | -0.3481464 |
| C | -4.2876180 | -2.4616989 | -0.4106593 |
| C | -2.3680115 | -5.5476173 | -0.0529820 |
| C | -1.3486679 | -4.5996064 | -0.3481464 |
| N | -1.9360774 | -3.3533844 | -0.5311224 |
| C | -1.9939648 | -6.8736430 | 0.1990322  |
| C | -0.6430657 | -7.2083533 | 0.1499425  |
| C | 0.3504905  | -6.2765686 | -0.1550882 |
| C | 0.0119152  | -4.9440356 | -0.4106593 |
| N | 0.9490986  | -3.9490316 | -0.7276229 |
| C | 2.2602787  | -3.9149175 | -0.2667166 |
| O | 2.7536475  | -4.7694574 | 0.4621726  |
| N | 2.9454124  | -2.7964593 | -0.7276229 |
| H | -6.4093692 | -2.0989238 | -0.1713131 |
| H | -1.4356522 | -2.4866226 | -0.7146953 |
| H | 1.3869633  | -6.6001384 | -0.1713131 |
| H | 0.6119982  | -3.1403840 | -1.2486121 |
| H | 2.4136532  | -2.1001980 | -1.2486121 |

|   |            |            |            |
|---|------------|------------|------------|
| N | -0.0000000 | 0.0000000  | -1.4987101 |
| O | 0.6312031  | 1.0932758  | -1.4849628 |
| O | 0.6312031  | -1.0932758 | -1.4849628 |
| O | -1.2624061 | 0.0000000  | -1.4849628 |
| N | 0.0000000  | 0.0000000  | 1.2845535  |
| C | -0.0000000 | 0.0000000  | 2.4458292  |
| H | 0.4878124  | -0.8449159 | 4.2299418  |
| H | 0.4878124  | 0.8449159  | 4.2299418  |
| H | -0.9756249 | 0.0000000  | 4.2299418  |
| N | 0.0000000  | 0.0000000  | 3.8575175  |
| F | -7.2104611 | 4.4854558  | 0.4050723  |
| F | -5.3193348 | 6.4243513  | 0.4982037  |
| F | -2.9039840 | 7.8188547  | 0.4982037  |
| F | -0.2792881 | 8.4871704  | 0.4050723  |
| F | 7.4897492  | 4.0017146  | 0.4050723  |
| F | 8.2233188  | 1.3945034  | 0.4982037  |
| F | 8.2233188  | -1.3945034 | 0.4982037  |
| F | 7.4897492  | -4.0017146 | 0.4050723  |
| F | -0.2792881 | -8.4871704 | 0.4050723  |
| F | -2.9039840 | -7.8188547 | 0.4982037  |
| F | -5.3193348 | -6.4243513 | 0.4982037  |
| F | -7.2104611 | -4.4854558 | 0.4050723  |

[2c...N≡C-N<sup>+</sup>H<sub>3</sub>]

|   |            |            |            |
|---|------------|------------|------------|
| C | -5.2423712 | 3.4517057  | -0.2655908 |
| C | -6.5858042 | 3.0988221  | -0.0508336 |
| C | -7.0206679 | 1.7484959  | -0.0108124 |
| C | -6.0499881 | 0.7302645  | -0.1864004 |
| C | -4.6971235 | 1.1270055  | -0.3960129 |
| C | -4.2712408 | 2.4691261  | -0.4435983 |
| C | -6.0499881 | -0.7302645 | -0.1864004 |
| C | -4.6971235 | -1.1270055 | -0.3960129 |
| N | -3.9064205 | 0.0000000  | -0.5270557 |
| C | -7.0206679 | -1.7484959 | -0.0108124 |
| C | -6.5858042 | -3.0988221 | -0.0508336 |
| C | -5.2423712 | -3.4517057 | -0.2655908 |
| C | -4.2712408 | -2.4691261 | -0.4435983 |
| N | -2.9198748 | -2.7455653 | -0.6763554 |
| C | -2.2507150 | -3.8983528 | -0.2634709 |
| O | -2.7655147 | -4.7900120 | 0.3952714  |
| N | -0.9177919 | -3.9014684 | -0.6763554 |
| H | -4.9652152 | 4.5010924  | -0.2846463 |
| H | -2.8931237 | 0.0000000  | -0.6195484 |
| H | -4.9652152 | -4.5010924 | -0.2846463 |
| H | -2.3679791 | -2.0265276 | -1.1427950 |
| H | -0.5710348 | -3.0639939 | -1.1427950 |
| C | -0.3680792 | -6.2658794 | -0.2655908 |

|   |            |            |            |
|---|------------|------------|------------|
| C | 0.6092435  | -7.2528848 | -0.0508336 |
| C | 1.9960921  | -6.9543247 | -0.0108124 |
| C | 2.3925665  | -5.6045757 | -0.1864004 |
| C | 1.3725463  | -4.6313310 | -0.3960129 |
| C | -0.0027056 | -4.9335661 | -0.4435983 |
| C | 3.6574217  | -4.8743112 | -0.1864004 |
| C | 3.3245771  | -3.5043255 | -0.3960129 |
| N | 1.9532102  | -3.3830594 | -0.5270557 |
| C | 5.0245759  | -5.2058288 | -0.0108124 |
| C | 5.9765608  | -4.1540627 | -0.0508336 |
| C | 5.6104504  | -2.8141738 | -0.2655908 |
| C | 4.2739463  | -2.4644399 | -0.4435983 |
| N | 3.8376667  | -1.1559031 | -0.6763554 |
| C | 4.5014301  | 0.0000000  | -0.2634709 |
| O | 5.5310294  | 0.0000000  | 0.3952714  |
| N | 3.8376667  | 1.1559031  | -0.6763554 |
| H | -1.4154528 | -6.5505487 | -0.2846463 |
| H | 1.4465619  | -2.5055186 | -0.6195484 |
| H | 6.3806680  | -2.0494563 | -0.2846463 |
| H | 2.9390139  | -1.0374662 | -1.1427950 |
| H | 2.9390139  | 1.0374662  | -1.1427950 |
| C | 5.6104504  | 2.8141738  | -0.2655908 |
| C | 5.9765608  | 4.1540627  | -0.0508336 |
| C | 5.0245759  | 5.2058288  | -0.0108124 |
| C | 3.6574217  | 4.8743112  | -0.1864004 |
| C | 3.3245771  | 3.5043255  | -0.3960129 |
| C | 4.2739463  | 2.4644399  | -0.4435983 |
| C | 2.3925665  | 5.6045757  | -0.1864004 |
| C | 1.3725463  | 4.6313310  | -0.3960129 |
| N | 1.9532102  | 3.3830594  | -0.5270557 |
| C | 1.9960921  | 6.9543247  | -0.0108124 |
| C | 0.6092435  | 7.2528848  | -0.0508336 |
| C | -0.3680792 | 6.2658794  | -0.2655908 |
| C | -0.0027056 | 4.9335661  | -0.4435983 |
| N | -0.9177919 | 3.9014684  | -0.6763554 |
| C | -2.2507150 | 3.8983528  | -0.2634709 |
| O | -2.7655147 | 4.7900120  | 0.3952714  |
| N | -2.9198748 | 2.7455653  | -0.6763554 |
| H | 6.3806680  | 2.0494563  | -0.2846463 |
| H | 1.4465619  | 2.5055186  | -0.6195484 |
| H | -1.4154528 | 6.5505487  | -0.2846463 |
| H | -0.5710348 | 3.0639939  | -1.1427950 |
| H | -2.3679791 | 2.0265276  | -1.1427950 |
| N | 0.0000000  | 0.0000000  | -1.2577631 |
| O | -0.6300149 | -1.0912177 | -1.2455304 |
| O | -0.6300149 | 1.0912177  | -1.2455304 |
| O | 1.2600297  | 0.0000000  | -1.2455304 |

|   |            |            |           |
|---|------------|------------|-----------|
| C | -7.5265475 | -4.1604895 | 0.1224557 |
| C | -8.4115256 | -1.5465503 | 0.2104370 |
| C | -8.4115256 | 1.5465503  | 0.2104370 |
| C | -7.5265475 | 4.1604895  | 0.1224557 |
| C | 0.1601841  | 8.5984261  | 0.1224557 |
| C | 2.8664109  | 8.0578700  | 0.2104370 |
| C | 5.5451146  | 6.5113197  | 0.2104370 |
| C | 7.3663634  | 4.4379366  | 0.1224557 |
| C | 7.3663634  | -4.4379366 | 0.1224557 |
| C | 5.5451146  | -6.5113197 | 0.2104370 |
| C | 2.8664109  | -8.0578700 | 0.2104370 |
| C | 0.1601841  | -8.5984261 | 0.1224557 |
| N | -0.2499313 | 9.6800070  | 0.2602942 |
| N | 3.4590536  | 9.0435617  | 0.3974144 |
| N | 6.1024274  | 7.5174091  | 0.3974144 |
| N | 8.5080976  | 4.6235567  | 0.2602942 |
| N | 8.5080976  | -4.6235567 | 0.2602942 |
| N | 6.1024274  | -7.5174091 | 0.3974144 |
| N | 3.4590536  | -9.0435617 | 0.3974144 |
| N | -0.2499313 | -9.6800070 | 0.2602942 |
| N | -8.2581664 | -5.0564503 | 0.2602942 |
| N | -9.5614810 | -1.5261525 | 0.3974144 |
| N | -9.5614810 | 1.5261525  | 0.3974144 |
| N | -8.2581664 | 5.0564503  | 0.2602942 |
| N | -0.0000000 | 0.0000000  | 1.7136921 |
| C | 0.0000000  | 0.0000000  | 2.8729239 |
| H | 0.9737030  | 0.0000000  | 4.6555458 |
| H | -0.4868515 | 0.8432515  | 4.6555458 |
| H | -0.4868515 | -0.8432515 | 4.6555458 |
| N | 0.0000000  | 0.0000000  | 4.2841757 |

[2c...N≡C-CH<sub>3</sub>]<sup>-</sup>

|   |            |            |            |
|---|------------|------------|------------|
| C | -5.2611121 | 3.4507053  | -0.2146706 |
| C | -6.6211291 | 3.0959038  | -0.1900058 |
| C | -7.0613429 | 1.7476672  | -0.2111986 |
| C | -6.0746273 | 0.7297285  | -0.2426037 |
| C | -4.7062383 | 1.1256839  | -0.2655680 |
| C | -4.2721513 | 2.4685810  | -0.2639210 |
| C | -6.0746273 | -0.7297285 | -0.2426037 |
| C | -4.7062383 | -1.1256839 | -0.2655680 |
| N | -3.9070147 | 0.0000000  | -0.2948473 |
| C | -7.0613429 | -1.7476672 | -0.2111986 |
| C | -6.6211291 | -3.0959038 | -0.1900058 |
| C | -5.2611121 | -3.4507053 | -0.2146706 |
| C | -4.2721513 | -2.4685810 | -0.2639210 |
| N | -2.9036366 | -2.7255732 | -0.3256467 |
| C | -2.2840319 | -3.9560593 | -0.1066538 |

|   |            |            |            |
|---|------------|------------|------------|
| O | -2.8699545 | -4.9709071 | 0.2428280  |
| N | -0.9085973 | -3.8774097 | -0.3256467 |
| H | -4.9816738 | 4.4989892  | -0.1954307 |
| H | -2.8925787 | 0.0000000  | -0.2142950 |
| H | -4.9816738 | -4.4989892 | -0.1954307 |
| H | -2.2970548 | -1.9539760 | -0.6111288 |
| H | -0.5436655 | -2.9662958 | -0.6111288 |
| C | -0.3578424 | -6.2816094 | -0.2146706 |
| C | 0.6294332  | -7.2820179 | -0.1900058 |
| C | 2.0171472  | -6.9891359 | -0.2111986 |
| C | 2.4053502  | -5.6256458 | -0.2426037 |
| C | 1.3782483  | -4.6385638 | -0.2655680 |
| C | -0.0017782 | -4.9340820 | -0.2639210 |
| C | 3.6692771  | -4.8959173 | -0.2426037 |
| C | 3.3279900  | -3.5128799 | -0.2655680 |
| N | 1.9535073  | -3.3835740 | -0.2948473 |
| C | 5.0441956  | -5.2414687 | -0.2111986 |
| C | 5.9916959  | -4.1861141 | -0.1900058 |
| C | 5.6189545  | -2.8309041 | -0.2146706 |
| C | 4.2739295  | -2.4655011 | -0.2639210 |
| N | 3.8122339  | -1.1518365 | -0.3256467 |
| C | 4.5680638  | 0.0000000  | -0.1066538 |
| O | 5.7399091  | 0.0000000  | 0.2428280  |
| N | 3.8122339  | 1.1518365  | -0.3256467 |
| H | -1.4054021 | -6.5637506 | -0.1954307 |
| H | 1.4462894  | -2.5050467 | -0.2142950 |
| H | 6.3870758  | -2.0647614 | -0.1954307 |
| H | 2.8407202  | -1.0123198 | -0.6111288 |
| H | 2.8407202  | 1.0123198  | -0.6111288 |
| C | 5.6189545  | 2.8309041  | -0.2146706 |
| C | 5.9916959  | 4.1861141  | -0.1900058 |
| C | 5.0441956  | 5.2414687  | -0.2111986 |
| C | 3.6692771  | 4.8959173  | -0.2426037 |
| C | 3.3279900  | 3.5128799  | -0.2655680 |
| C | 4.2739295  | 2.4655011  | -0.2639210 |
| C | 2.4053502  | 5.6256458  | -0.2426037 |
| C | 1.3782483  | 4.6385638  | -0.2655680 |
| N | 1.9535073  | 3.3835740  | -0.2948473 |
| C | 2.0171472  | 6.9891359  | -0.2111986 |
| C | 0.6294332  | 7.2820179  | -0.1900058 |
| C | -0.3578424 | 6.2816094  | -0.2146706 |
| C | -0.0017782 | 4.9340820  | -0.2639210 |
| N | -0.9085973 | 3.8774097  | -0.3256467 |
| C | -2.2840319 | 3.9560593  | -0.1066538 |
| O | -2.8699545 | 4.9709071  | 0.2428280  |
| N | -2.9036366 | 2.7255732  | -0.3256467 |
| H | 6.3870758  | 2.0647614  | -0.1954307 |

|   |            |            |            |
|---|------------|------------|------------|
| H | 1.4462894  | 2.5050467  | -0.2142950 |
| H | -1.4054021 | 6.5637506  | -0.1954307 |
| H | -0.5436655 | 2.9662958  | -0.6111288 |
| H | -2.2970548 | 1.9539760  | -0.6111288 |
| N | 0.0000000  | 0.0000000  | -0.9581961 |
| O | -0.6295029 | -1.0903310 | -0.9612842 |
| O | -0.6295029 | 1.0903310  | -0.9612842 |
| O | 1.2590058  | 0.0000000  | -0.9612842 |
| C | -7.5760479 | -4.1587347 | -0.1551346 |
| C | -8.4699647 | -1.5486858 | -0.2034243 |
| C | -8.4699647 | 1.5486858  | -0.2034243 |
| C | -7.5760479 | 4.1587347  | -0.1551346 |
| C | 0.1864541  | 8.6404173  | -0.1551346 |
| C | 2.8937811  | 8.1095475  | -0.2034243 |
| C | 5.5761836  | 6.5608617  | -0.2034243 |
| C | 7.3895939  | 4.4816826  | -0.1551346 |
| C | 7.3895939  | -4.4816826 | -0.1551346 |
| C | 5.5761836  | -6.5608617 | -0.2034243 |
| C | 2.8937811  | -8.1095475 | -0.2034243 |
| C | 0.1864541  | -8.6404173 | -0.1551346 |
| N | -0.2148342 | 9.7339376  | -0.1288349 |
| N | 3.4920379  | 9.1097988  | -0.2004401 |
| N | 6.1432983  | 7.5790929  | -0.2004401 |
| N | 8.5372544  | 4.6809169  | -0.1288349 |
| N | 8.5372544  | -4.6809169 | -0.1288349 |
| N | 6.1432983  | -7.5790929 | -0.2004401 |
| N | 3.4920379  | -9.1097988 | -0.2004401 |
| N | -0.2148342 | -9.7339376 | -0.1288349 |
| N | -8.3224202 | -5.0530207 | -0.1288349 |
| N | -9.6353361 | -1.5307059 | -0.2004401 |
| N | -9.6353361 | 1.5307059  | -0.2004401 |
| N | -8.3224202 | 5.0530207  | -0.1288349 |
| N | 0.0000000  | 0.0000000  | 1.9092859  |
| C | 0.0000000  | 0.0000000  | 3.0706671  |
| C | 0.0000000  | 0.0000000  | 4.5244204  |
| H | 1.0316811  | 0.0000000  | 4.9015438  |
| H | -0.5158405 | 0.8934620  | 4.9015438  |
| H | -0.5158405 | -0.8934620 | 4.9015438  |

[2c...N≡CH]<sup>-</sup>

|   |            |            |            |
|---|------------|------------|------------|
| C | -5.2658177 | 3.4523228  | -0.0601314 |
| C | -6.6259242 | 3.0977667  | -0.0596855 |
| C | -7.0654395 | 1.7495236  | -0.0834488 |
| C | -6.0790466 | 0.7301722  | -0.0936348 |
| C | -4.7105865 | 1.1265940  | -0.0946760 |
| C | -4.2763538 | 2.4704266  | -0.0899990 |
| C | -6.0790466 | -0.7301722 | -0.0936348 |



|   |            |            |            |
|---|------------|------------|------------|
| C | -4.7105865 | -1.1265940 | -0.0946760 |
| N | -3.9111341 | 0.0000000  | -0.1124873 |
| C | -7.0654395 | -1.7495236 | -0.0834488 |
| C | -6.6259242 | -3.0977667 | -0.0596855 |
| C | -5.2658177 | -3.4523228 | -0.0601314 |
| C | -4.2763538 | -2.4704266 | -0.0899990 |
| N | -2.9073086 | -2.7305230 | -0.1332868 |
| C | -2.2891604 | -3.9649420 | 0.0744773  |
| O | -2.8777204 | -4.9843580 | 0.4050246  |
| N | -0.9110480 | -3.8830646 | -0.1332868 |
| H | -4.9857199 | 4.5006071  | -0.0419109 |
| H | -2.8991922 | 0.0000000  | -0.0085080 |
| H | -4.9857199 | -4.5006071 | -0.0419109 |
| H | -2.2979093 | -1.9562134 | -0.4025271 |
| H | -0.5451759 | -2.9681545 | -0.4025271 |
| C | -0.3568904 | -6.2864933 | -0.0601314 |
| C | 0.6302175  | -7.2871021 | -0.0596855 |
| C | 2.0175878  | -6.9936119 | -0.0834488 |
| C | 2.4071757  | -5.6296949 | -0.0936348 |
| C | 1.3796342  | -4.6427846 | -0.0946760 |
| C | -0.0012753 | -4.9386443 | -0.0899990 |
| C | 3.6718710  | -4.8995227 | -0.0936348 |
| C | 3.3309523  | -3.5161906 | -0.0946760 |
| N | 1.9555670  | -3.3871415 | -0.1124873 |
| C | 5.0478517  | -5.2440883 | -0.0834488 |
| C | 5.9957068  | -4.1893354 | -0.0596855 |
| C | 5.6227081  | -2.8341705 | -0.0601314 |
| C | 4.2776291  | -2.4682177 | -0.0899990 |
| N | 3.8183566  | -1.1525416 | -0.1332868 |
| C | 4.5783207  | 0.0000000  | 0.0744773  |
| O | 5.7554409  | 0.0000000  | 0.4050246  |
| N | 3.8183566  | 1.1525416  | -0.1332868 |
| H | -1.4047801 | -6.5680636 | -0.0419109 |
| H | 1.4495961  | -2.5107741 | -0.0085080 |
| H | 6.3905000  | -2.0674565 | -0.0419109 |
| H | 2.8430852  | -1.0119411 | -0.4025271 |
| H | 2.8430852  | 1.0119411  | -0.4025271 |
| C | 5.6227081  | 2.8341705  | -0.0601314 |
| C | 5.9957068  | 4.1893354  | -0.0596855 |
| C | 5.0478517  | 5.2440883  | -0.0834488 |
| C | 3.6718710  | 4.8995227  | -0.0936348 |
| C | 3.3309523  | 3.5161906  | -0.0946760 |
| C | 4.2776291  | 2.4682177  | -0.0899990 |
| C | 2.4071757  | 5.6296949  | -0.0936348 |
| C | 1.3796342  | 4.6427846  | -0.0946760 |
| N | 1.9555670  | 3.3871415  | -0.1124873 |
| C | 2.0175878  | 6.9936119  | -0.0834488 |

|   |            |            |            |
|---|------------|------------|------------|
| C | 0.6302175  | 7.2871021  | -0.0596855 |
| C | -0.3568904 | 6.2864933  | -0.0601314 |
| C | -0.0012753 | 4.9386443  | -0.0899990 |
| N | -0.9110480 | 3.8830646  | -0.1332868 |
| C | -2.2891604 | 3.9649420  | 0.0744773  |
| O | -2.8777204 | 4.9843580  | 0.4050246  |
| N | -2.9073086 | 2.7305230  | -0.1332868 |
| H | 6.3905000  | 2.0674565  | -0.0419109 |
| H | 1.4495961  | 2.5107741  | -0.0085080 |
| H | -1.4047801 | 6.5680636  | -0.0419109 |
| H | -0.5451759 | 2.9681545  | -0.4025271 |
| H | -2.2979093 | 1.9562134  | -0.4025271 |
| N | -0.0000000 | 0.0000000  | -0.6685872 |
| O | -0.6291849 | -1.0897802 | -0.6695877 |
| O | -0.6291849 | 1.0897802  | -0.6695877 |
| O | 1.2583698  | 0.0000000  | -0.6695877 |
| C | -7.5788390 | -4.1633063 | -0.0568785 |
| C | -8.4735181 | -1.5505293 | -0.1076998 |
| C | -8.4735181 | 1.5505293  | -0.1076998 |
| C | -7.5788390 | 4.1633063  | -0.0568785 |
| C | 0.1838905  | 8.6451203  | -0.0568785 |
| C | 2.8939613  | 8.1135466  | -0.1076998 |
| C | 5.5795569  | 6.5630173  | -0.1076998 |
| C | 7.3949486  | 4.4818140  | -0.0568785 |
| C | 7.3949486  | -4.4818140 | -0.0568785 |
| C | 5.5795569  | -6.5630173 | -0.1076998 |
| C | 2.8939613  | -8.1135466 | -0.1076998 |
| C | 0.1838905  | -8.6451203 | -0.0568785 |
| N | -0.2271895 | 9.7353906  | -0.0633666 |
| N | 3.4984311  | 9.1096110  | -0.1363534 |
| N | 6.1399390  | 7.5845357  | -0.1363534 |
| N | 8.5446904  | 4.6709434  | -0.0633666 |
| N | 8.5446904  | -4.6709434 | -0.0633666 |
| N | 6.1399390  | -7.5845357 | -0.1363534 |
| N | 3.4984311  | -9.1096110 | -0.1363534 |
| N | -0.2271895 | -9.7353906 | -0.0633666 |
| N | -8.3175008 | -5.0644472 | -0.0633666 |
| N | -9.6383701 | -1.5250753 | -0.1363534 |
| N | -9.6383701 | 1.5250753  | -0.1363534 |
| N | -8.3175008 | 5.0644472  | -0.0633666 |
| N | -0.0000000 | 0.0000000  | 2.2510614  |
| C | -0.0000000 | 0.0000000  | 3.4079960  |
| H | -0.0000000 | 0.0000000  | 4.4843793  |

[2c...N≡C]<sup>2-</sup>

|   |            |            |            |
|---|------------|------------|------------|
| C | -5.2173183 | 3.4438824  | 0.0162989  |
| C | -6.5806811 | 3.0993890  | 0.0192125  |
| C | -7.0335110 | 1.7540342  | 0.0007836  |
| C | -6.0541709 | 0.7288724  | 0.0090194  |
| C | -4.6839776 | 1.1170603  | 0.0309222  |
| C | -4.2359990 | 2.4505539  | 0.0036644  |
| C | -6.0541709 | -0.7288724 | 0.0090194  |
| C | -4.6839776 | -1.1170603 | 0.0309222  |
| N | -3.8807986 | 0.0000000  | 0.0416514  |
| C | -7.0335110 | -1.7540342 | 0.0007836  |
| C | -6.5806811 | -3.0993890 | 0.0192125  |
| C | -5.2173183 | -3.4438824 | 0.0162989  |
| C | -4.2359990 | -2.4505539 | 0.0036644  |
| N | -2.8681867 | -2.6747225 | -0.0656087 |
| C | -2.2487245 | -3.8949051 | 0.1704451  |
| O | -2.8327694 | -4.9065006 | 0.5411076  |
| N | -0.8822843 | -3.8212838 | -0.0656087 |
| H | -4.9290901 | 4.4896646  | 0.0205267  |
| H | -2.8860241 | 0.0000000  | 0.2829256  |
| H | -4.9290901 | -4.4896646 | 0.0205267  |
| H | -2.2644651 | -1.8992418 | -0.3696149 |
| H | -0.5125591 | -2.9107052 | -0.3696149 |
| C | -0.3738304 | -6.2402714 | 0.0162989  |
| C | 0.6061909  | -7.2487315 | 0.0192125  |
| C | 1.9977173  | -6.9682163 | 0.0007836  |
| C | 2.3958634  | -5.6075020 | 0.0090194  |
| C | 1.3745862  | -4.6149737 | 0.0309222  |
| C | -0.0042424 | -4.8937596 | 0.0036644  |
| C | 3.6583075  | -4.8786296 | 0.0090194  |
| C | 3.3093914  | -3.4979134 | 0.0309222  |
| N | 1.9403993  | -3.3608702 | 0.0416514  |
| C | 5.0357937  | -5.2141821 | 0.0007836  |
| C | 5.9744901  | -4.1493425 | 0.0192125  |
| C | 5.5911488  | -2.7963890 | 0.0162989  |
| C | 4.2402414  | -2.4432058 | 0.0036644  |
| N | 3.7504710  | -1.1465613 | -0.0656087 |
| C | 4.4974490  | 0.0000000  | 0.1704451  |
| O | 5.6655389  | 0.0000000  | 0.5411076  |
| N | 3.7504710  | 1.1465613  | -0.0656087 |
| H | -1.4236186 | -6.5135495 | 0.0205267  |
| H | 1.4430121  | -2.4993702 | 0.2829256  |
| H | 6.3527086  | -2.0238849 | 0.0205267  |
| H | 2.7770242  | -1.0114634 | -0.3696149 |
| H | 2.7770242  | 1.0114634  | -0.3696149 |
| C | 5.5911488  | 2.7963890  | 0.0162989  |
| C | 5.9744901  | 4.1493425  | 0.0192125  |
| C | 5.0357937  | 5.2141821  | 0.0007836  |

|   |            |            |            |
|---|------------|------------|------------|
| C | 3.6583075  | 4.8786296  | 0.0090194  |
| C | 3.3093914  | 3.4979134  | 0.0309222  |
| C | 4.2402414  | 2.4432058  | 0.0036644  |
| C | 2.3958634  | 5.6075020  | 0.0090194  |
| C | 1.3745862  | 4.6149737  | 0.0309222  |
| N | 1.9403993  | 3.3608702  | 0.0416514  |
| C | 1.9977173  | 6.9682163  | 0.0007836  |
| C | 0.6061909  | 7.2487315  | 0.0192125  |
| C | -0.3738304 | 6.2402714  | 0.0162989  |
| C | -0.0042424 | 4.8937596  | 0.0036644  |
| N | -0.8822843 | 3.8212838  | -0.0656087 |
| C | -2.2487245 | 3.8949051  | 0.1704451  |
| O | -2.8327694 | 4.9065006  | 0.5411076  |
| N | -2.8681867 | 2.6747225  | -0.0656087 |
| H | 6.3527086  | 2.0238849  | 0.0205267  |
| H | 1.4430121  | 2.4993702  | 0.2829256  |
| H | -1.4236186 | 6.5135495  | 0.0205267  |
| H | -0.5125591 | 2.9107052  | -0.3696149 |
| H | -2.2644651 | 1.8992418  | -0.3696149 |
| N | 0.0000000  | 0.0000000  | -1.2068466 |
| O | -0.6318991 | -1.0944814 | -1.2214268 |
| O | -0.6318991 | 1.0944814  | -1.2214268 |
| O | 1.2637983  | 0.0000000  | -1.2214268 |
| C | -7.5274734 | -4.1700974 | 0.0184306  |
| C | -8.4426595 | -1.5634656 | -0.0277410 |
| C | -8.4426595 | 1.5634656  | -0.0277410 |
| C | -7.5274734 | 4.1700974  | 0.0184306  |
| C | 0.1523264  | 8.6040319  | 0.0184306  |
| C | 2.8673288  | 8.0932904  | -0.0277410 |
| C | 5.5753306  | 6.5298248  | -0.0277410 |
| C | 7.3751470  | 4.4339345  | 0.0184306  |
| C | 7.3751470  | -4.4339345 | 0.0184306  |
| C | 5.5753306  | -6.5298248 | -0.0277410 |
| C | 2.8673288  | -8.0932904 | -0.0277410 |
| C | 0.1523264  | -8.6040319 | 0.0184306  |
| N | -0.2563997 | 9.6956587  | 0.0153497  |
| N | 3.4666534  | 9.0930526  | -0.0553503 |
| N | 6.1414878  | 7.5487362  | -0.0553503 |
| N | 8.5248866  | 4.6257807  | 0.0153497  |
| N | 8.5248866  | -4.6257807 | 0.0153497  |
| N | 6.1414878  | -7.5487362 | -0.0553503 |
| N | 3.4666534  | -9.0930526 | -0.0553503 |
| N | -0.2563997 | -9.6956587 | 0.0153497  |
| N | -8.2684869 | -5.0698780 | 0.0153497  |
| N | -9.6081412 | -1.5443163 | -0.0553503 |
| N | -9.6081412 | 1.5443163  | -0.0553503 |
| N | -8.2684869 | 5.0698780  | 0.0153497  |

|   |            |           |           |
|---|------------|-----------|-----------|
| N | -0.0000000 | 0.0000000 | 1.4423685 |
| C | 0.0000000  | 0.0000000 | 2.6250103 |

[2c...Cl]<sup>2-</sup>

|   |            |            |            |
|---|------------|------------|------------|
| C | -5.2042096 | 3.4418960  | 0.0361264  |
| C | -6.5683207 | 3.1004319  | 0.0566892  |
| C | -7.0239097 | 1.7555698  | 0.0517233  |
| C | -6.0465838 | 0.7285926  | 0.0570962  |
| C | -4.6756525 | 1.1146192  | 0.0704112  |
| C | -4.2261764 | 2.4452889  | 0.0238722  |
| C | -6.0465838 | -0.7285926 | 0.0570962  |
| C | -4.6756525 | -1.1146192 | 0.0704112  |
| N | -3.8699787 | 0.0000000  | 0.0833638  |
| C | -7.0239097 | -1.7555698 | 0.0517233  |
| C | -6.5683207 | -3.1004319 | 0.0566892  |
| C | -5.2042096 | -3.4418960 | 0.0361264  |
| C | -4.2261764 | -2.4452889 | 0.0238722  |
| N | -2.8590801 | -2.6615888 | -0.0664966 |
| C | -2.2360300 | -3.8729176 | 0.1930296  |
| O | -2.8138997 | -4.8738172 | 0.6026263  |
| N | -0.8754635 | -3.8068304 | -0.0664966 |
| H | -4.9140774 | 4.4870865  | 0.0261030  |
| H | -2.8751879 | 0.0000000  | 0.3427098  |
| H | -4.9140774 | -4.4870865 | 0.0261030  |
| H | -2.2620971 | -1.8876620 | -0.3898439 |
| H | -0.5037147 | -2.9028646 | -0.3898439 |
| C | -0.3786646 | -6.2279258 | 0.0361264  |
| C | 0.5991075  | -7.2385486 | 0.0566892  |
| C | 1.9915868  | -6.9606691 | 0.0517233  |
| C | 2.3923122  | -5.6007915 | 0.0570962  |
| C | 1.3725377  | -4.6065434 | 0.0704112  |
| C | -0.0045941 | -4.8826206 | 0.0238722  |
| C | 3.6542716  | -4.8721988 | 0.0570962  |
| C | 3.3031148  | -3.4919242 | 0.0704112  |
| N | 1.9349894  | -3.3514999 | 0.0833638  |
| C | 5.0323229  | -5.2050993 | 0.0517233  |
| C | 5.9692132  | -4.1381166 | 0.0566892  |
| C | 5.5828742  | -2.7860297 | 0.0361264  |
| C | 4.2307705  | -2.4373317 | 0.0238722  |
| N | 3.7345436  | -1.1452416 | -0.0664966 |
| C | 4.4720601  | 0.0000000  | 0.1930296  |
| O | 5.6277994  | 0.0000000  | 0.6026263  |
| N | 3.7345436  | 1.1452416  | -0.0664966 |
| H | -1.4288922 | -6.4992591 | 0.0261030  |
| H | 1.4375940  | -2.4899858 | 0.3427098  |
| H | 6.3429696  | -2.0121726 | 0.0261030  |
| H | 2.7658118  | -1.0152026 | -0.3898439 |

|   |            |            |            |
|---|------------|------------|------------|
| H | 2.7658118  | 1.0152026  | -0.3898439 |
| C | 5.5828742  | 2.7860297  | 0.0361264  |
| C | 5.9692132  | 4.1381166  | 0.0566892  |
| C | 5.0323229  | 5.2050993  | 0.0517233  |
| C | 3.6542716  | 4.8721988  | 0.0570962  |
| C | 3.3031148  | 3.4919242  | 0.0704112  |
| C | 4.2307705  | 2.4373317  | 0.0238722  |
| C | 2.3923122  | 5.6007915  | 0.0570962  |
| C | 1.3725377  | 4.6065434  | 0.0704112  |
| N | 1.9349894  | 3.3514999  | 0.0833638  |
| C | 1.9915868  | 6.9606691  | 0.0517233  |
| C | 0.5991075  | 7.2385486  | 0.0566892  |
| C | -0.3786646 | 6.2279258  | 0.0361264  |
| C | -0.0045941 | 4.8826206  | 0.0238722  |
| N | -0.8754635 | 3.8068304  | -0.0664966 |
| C | -2.2360300 | 3.8729176  | 0.1930296  |
| O | -2.8138997 | 4.8738172  | 0.6026263  |
| N | -2.8590801 | 2.6615888  | -0.0664966 |
| H | 6.3429696  | 2.0121726  | 0.0261030  |
| H | 1.4375940  | 2.4899858  | 0.3427098  |
| H | -1.4288922 | 6.4992591  | 0.0261030  |
| H | -0.5037147 | 2.9028646  | -0.3898439 |
| H | -2.2620971 | 1.8876620  | -0.3898439 |
| N | 0.0000000  | 0.0000000  | -1.3739646 |
| O | -0.6329256 | -1.0962593 | -1.3852370 |
| O | -0.6329256 | 1.0962593  | -1.3852370 |
| O | 1.2658512  | 0.0000000  | -1.3852370 |
| C | -7.5130989 | -4.1728383 | 0.0579721  |
| C | -8.4334930 | -1.5664024 | 0.0404342  |
| C | -8.4334930 | 1.5664024  | 0.0404342  |
| C | -7.5130989 | 4.1728383  | 0.0579721  |
| C | 0.1427655  | 8.5929537  | 0.0579721  |
| C | 2.8602023  | 8.0868204  | 0.0404342  |
| C | 5.5732908  | 6.5204180  | 0.0404342  |
| C | 7.3703334  | 4.4201154  | 0.0579721  |
| C | 7.3703334  | -4.4201154 | 0.0579721  |
| C | 5.5732908  | -6.5204180 | 0.0404342  |
| C | 2.8602023  | -8.0868204 | 0.0404342  |
| C | 0.1427655  | -8.5929537 | 0.0579721  |
| N | -0.2679617 | 9.6838870  | 0.0565344  |
| N | 3.4603851  | 9.0864314  | 0.0286493  |
| N | 6.1388879  | 7.5399971  | 0.0286493  |
| N | 8.5204730  | 4.6098818  | 0.0565344  |
| N | 8.5204730  | -4.6098818 | 0.0565344  |
| N | 6.1388879  | -7.5399971 | 0.0286493  |
| N | 3.4603851  | -9.0864314 | 0.0286493  |
| N | -0.2679617 | -9.6838870 | 0.0565344  |

|    |            |            |           |
|----|------------|------------|-----------|
| N  | -8.2525113 | -5.0740052 | 0.0565344 |
| N  | -9.5992730 | -1.5464343 | 0.0286493 |
| N  | -9.5992730 | 1.5464343  | 0.0286493 |
| N  | -8.2525113 | 5.0740052  | 0.0565344 |
| Cl | -0.0000000 | 0.0000000  | 1.5688580 |

[2c...BF<sub>4</sub>]<sup>2-</sup>

|   |            |            |            |
|---|------------|------------|------------|
| C | -5.2558219 | 3.4467465  | -0.0735663 |
| C | -6.6135154 | 3.0917233  | -0.1398099 |
| C | -7.0520668 | 1.7441819  | -0.1910906 |
| C | -6.0625640 | 0.7286061  | -0.1704087 |
| C | -4.6936329 | 1.1230284  | -0.1268793 |
| C | -4.2610674 | 2.4662903  | -0.0710885 |
| C | -6.0625640 | -0.7286061 | -0.1704087 |
| C | -4.6936329 | -1.1230284 | -0.1268793 |
| N | -3.8947974 | 0.0000000  | -0.1104971 |
| C | -7.0520668 | -1.7441819 | -0.1910906 |
| C | -6.6135154 | -3.0917233 | -0.1398099 |
| C | -5.2558219 | -3.4467465 | -0.0735663 |
| C | -4.2610674 | -2.4662903 | -0.0710885 |
| N | -2.8987297 | -2.7250942 | -0.0085920 |
| C | -2.2979477 | -3.9801621 | -0.0393097 |
| O | -2.9097237 | -5.0397892 | -0.0946126 |
| N | -0.9106360 | -3.8729207 | -0.0085920 |
| H | -4.9777756 | 4.4939517  | -0.0249228 |
| H | -2.8794734 | 0.0000000  | -0.2105117 |
| H | -4.9777756 | -4.4939517 | -0.0249228 |
| H | -2.2613218 | -1.9252985 | -0.0045227 |
| H | -0.5366965 | -2.9210114 | -0.0045227 |
| C | -0.3570591 | -6.2750485 | -0.0735663 |
| C | 0.6292468  | -7.2733339 | -0.1398099 |
| C | 2.0155276  | -6.9793599 | -0.1910906 |
| C | 2.4002906  | -5.6146375 | -0.1704087 |
| C | 1.3742454  | -4.6263195 | -0.1268793 |
| C | -0.0053364 | -4.9233378 | -0.0710885 |
| C | 3.6622734  | -4.8860314 | -0.1704087 |
| C | 3.3193875  | -3.5032912 | -0.1268793 |
| N | 1.9473987  | -3.3729935 | -0.1104971 |
| C | 5.0365392  | -5.2351780 | -0.1910906 |
| C | 5.9842686  | -4.1816107 | -0.1398099 |
| C | 5.6128810  | -2.8283021 | -0.0735663 |
| C | 4.2664038  | -2.4570474 | -0.0710885 |
| N | 3.8093657  | -1.1478265 | -0.0085920 |
| C | 4.5958954  | 0.0000000  | -0.0393097 |
| O | 5.8194473  | 0.0000000  | -0.0946126 |
| N | 3.8093657  | 1.1478265  | -0.0085920 |
| H | -1.4029885 | -6.5578560 | -0.0249228 |

|   |            |            |            |
|---|------------|------------|------------|
| H | 1.4397367  | -2.4936971 | -0.2105117 |
| H | 6.3807641  | -2.0639043 | -0.0249228 |
| H | 2.7980183  | -0.9957129 | -0.0045227 |
| H | 2.7980183  | 0.9957129  | -0.0045227 |
| C | 5.6128810  | 2.8283021  | -0.0735663 |
| C | 5.9842686  | 4.1816107  | -0.1398099 |
| C | 5.0365392  | 5.2351780  | -0.1910906 |
| C | 3.6622734  | 4.8860314  | -0.1704087 |
| C | 3.3193875  | 3.5032912  | -0.1268793 |
| C | 4.2664038  | 2.4570474  | -0.0710885 |
| C | 2.4002906  | 5.6146375  | -0.1704087 |
| C | 1.3742454  | 4.6263195  | -0.1268793 |
| N | 1.9473987  | 3.3729935  | -0.1104971 |
| C | 2.0155276  | 6.9793599  | -0.1910906 |
| C | 0.6292468  | 7.2733339  | -0.1398099 |
| C | -0.3570591 | 6.2750485  | -0.0735663 |
| C | -0.0053364 | 4.9233378  | -0.0710885 |
| N | -0.9106360 | 3.8729207  | -0.0085920 |
| C | -2.2979477 | 3.9801621  | -0.0393097 |
| O | -2.9097237 | 5.0397892  | -0.0946126 |
| N | -2.8987297 | 2.7250942  | -0.0085920 |
| H | 6.3807641  | 2.0639043  | -0.0249228 |
| H | 1.4397367  | 2.4936971  | -0.2105117 |
| H | -1.4029885 | 6.5578560  | -0.0249228 |
| H | -0.5366965 | 2.9210114  | -0.0045227 |
| H | -2.2613218 | 1.9252985  | -0.0045227 |
| N | 0.0000000  | 0.0000000  | -0.8367074 |
| O | -0.6311495 | -1.0931829 | -0.8546649 |
| O | -0.6311495 | 1.0931829  | -0.8546649 |
| O | 1.2622989  | 0.0000000  | -0.8546649 |
| C | -7.5685967 | -4.1549891 | -0.1524796 |
| C | -8.4583515 | -1.5479856 | -0.2729997 |
| C | -8.4583515 | 1.5479856  | -0.2729997 |
| C | -7.5685967 | 4.1549891  | -0.1524796 |
| C | 0.1859722  | 8.6320915  | -0.1524796 |
| C | 2.8885809  | 8.0991401  | -0.2729997 |
| C | 5.5697706  | 6.5511545  | -0.2729997 |
| C | 7.3826244  | 4.4771024  | -0.1524796 |
| C | 7.3826244  | -4.4771024 | -0.1524796 |
| C | 5.5697706  | -6.5511545 | -0.2729997 |
| C | 2.8885809  | -8.0991401 | -0.2729997 |
| C | 0.1859722  | -8.6320915 | -0.1524796 |
| N | -0.2139175 | 9.7268046  | -0.1619830 |
| N | 3.4809608  | 9.1003674  | -0.3503783 |
| N | 6.1406690  | 7.5647842  | -0.3503783 |
| N | 8.5306186  | 4.6781443  | -0.1619830 |
| N | 8.5306186  | -4.6781443 | -0.1619830 |



|   |            |            |            |
|---|------------|------------|------------|
| N | 6.1406690  | -7.5647842 | -0.3503783 |
| N | 3.4809608  | -9.1003674 | -0.3503783 |
| N | -0.2139175 | -9.7268046 | -0.1619830 |
| N | -8.3167011 | -5.0486602 | -0.1619830 |
| N | -9.6216298 | -1.5355833 | -0.3503783 |
| N | -9.6216298 | 1.5355833  | -0.3503783 |
| N | -8.3167011 | 5.0486602  | -0.1619830 |
| B | 0.0000000  | 0.0000000  | 3.0828549  |
| F | 1.3435713  | 0.0000000  | 3.5133154  |
| F | -0.6717857 | 1.1635669  | 3.5133154  |
| F | -0.6717857 | -1.1635669 | 3.5133154  |
| F | 0.0000000  | 0.0000000  | 1.6350198  |

[2a...N≡C]<sup>2-</sup>

|   |            |            |            |
|---|------------|------------|------------|
| C | 5.3168945  | -3.4309322 | -0.0108620 |
| C | 6.6669870  | -3.0320145 | 0.0073225  |
| C | 7.0413116  | -1.6912353 | 0.0042655  |
| C | 6.0250735  | -0.7228125 | -0.0004905 |
| C | 4.6643882  | -1.1257221 | -0.0047629 |
| C | 4.2820114  | -2.4822474 | -0.0264576 |
| C | 6.0250735  | 0.7228125  | -0.0004905 |
| C | 4.6643882  | 1.1257221  | -0.0047629 |
| N | 3.8533535  | 0.0000000  | -0.0198617 |
| C | 7.0413116  | 1.6912353  | 0.0042655  |
| C | 6.6669870  | 3.0320145  | 0.0073225  |
| C | 5.3168945  | 3.4309322  | -0.0108620 |
| C | 4.2820114  | 2.4822474  | -0.0264576 |
| N | 2.9174898  | 2.7682129  | -0.0839389 |
| C | 2.3149087  | 4.0095396  | 0.0545358  |
| O | 2.9215498  | 5.0602726  | 0.2695973  |
| N | 0.9385978  | 3.9107267  | -0.0839389 |
| H | 5.0520165  | -4.4838763 | -0.0101301 |
| H | 7.4345812  | -3.8087562 | 0.0181279  |
| H | 8.0916636  | -1.3954318 | 0.0110623  |
| H | 2.8488746  | 0.0000000  | 0.1646402  |
| H | 8.0916636  | 1.3954318  | 0.0110623  |
| H | 7.4345812  | 3.8087562  | 0.0181279  |
| H | 5.0520165  | 4.4838763  | -0.0101301 |
| H | 2.2883740  | 1.9809977  | -0.2730853 |
| H | 0.5714074  | 2.9722889  | -0.2730853 |
| C | 0.3128272  | 6.3200318  | -0.0108620 |
| C | -0.7076919 | 7.2897874  | 0.0073225  |
| C | -2.0560030 | 6.9435724  | 0.0042655  |
| C | -2.3865628 | 5.5792729  | -0.0004905 |
| C | -1.3572901 | 4.6023398  | -0.0047629 |
| C | 0.0086836  | 4.9494544  | -0.0264576 |
| C | -3.6385107 | 4.8564604  | -0.0004905 |

|   |            |            |            |
|---|------------|------------|------------|
| C | -3.3070981 | 3.4766176  | -0.0047629 |
| N | -1.9266768 | 3.3371020  | -0.0198617 |
| C | -4.9853085 | 5.2523370  | 0.0042655  |
| C | -5.9592951 | 4.2577729  | 0.0073225  |
| C | -5.6297217 | 2.8890996  | -0.0108620 |
| C | -4.2906950 | 2.4672069  | -0.0264576 |
| N | -3.8560876 | 1.1425138  | -0.0839389 |
| C | -4.6298175 | 0.0000000  | 0.0545358  |
| O | -5.8430995 | 0.0000000  | 0.2695973  |
| N | -3.8560876 | -1.1425138 | -0.0839389 |
| H | 1.3571425  | 6.6171127  | -0.0101301 |
| H | -0.4188110 | 8.3429143  | 0.0181279  |
| H | -2.8373524 | 7.7053021  | 0.0110623  |
| H | -1.4244373 | 2.4671978  | 0.1646402  |
| H | -5.2543112 | 6.3098703  | 0.0110623  |
| H | -7.0157702 | 4.5341581  | 0.0181279  |
| H | -6.4091590 | 2.1332365  | -0.0101301 |
| H | -2.8597813 | 0.9912911  | -0.2730853 |
| H | -2.8597813 | -0.9912911 | -0.2730853 |
| C | -5.6297217 | -2.8890996 | -0.0108620 |
| C | -5.9592951 | -4.2577729 | 0.0073225  |
| C | -4.9853085 | -5.2523370 | 0.0042655  |
| C | -3.6385107 | -4.8564604 | -0.0004905 |
| C | -3.3070981 | -3.4766176 | -0.0047629 |
| C | -4.2906950 | -2.4672069 | -0.0264576 |
| C | -2.3865628 | -5.5792729 | -0.0004905 |
| C | -1.3572901 | -4.6023398 | -0.0047629 |
| N | -1.9266768 | -3.3371020 | -0.0198617 |
| C | -2.0560030 | -6.9435724 | 0.0042655  |
| C | -0.7076919 | -7.2897874 | 0.0073225  |
| C | 0.3128272  | -6.3200318 | -0.0108620 |
| C | 0.0086836  | -4.9494544 | -0.0264576 |
| N | 0.9385978  | -3.9107267 | -0.0839389 |
| C | 2.3149087  | -4.0095396 | 0.0545358  |
| O | 2.9215498  | -5.0602726 | 0.2695973  |
| N | 2.9174898  | -2.7682129 | -0.0839389 |
| H | -6.4091590 | -2.1332365 | -0.0101301 |
| H | -7.0157702 | -4.5341581 | 0.0181279  |
| H | -5.2543112 | -6.3098703 | 0.0110623  |
| H | -1.4244373 | -2.4671978 | 0.1646402  |
| H | -2.8373524 | -7.7053021 | 0.0110623  |
| H | -0.4188110 | -8.3429143 | 0.0181279  |
| H | 1.3571425  | -6.6171127 | -0.0101301 |
| H | 0.5714074  | -2.9722889 | -0.2730853 |
| H | 2.2883740  | -1.9809977 | -0.2730853 |
| N | -0.0000000 | 0.0000000  | -0.9633341 |
| O | 0.6314744  | 1.0937457  | -0.9803762 |

|   |            |            |            |
|---|------------|------------|------------|
| O | 0.6314744  | -1.0937457 | -0.9803762 |
| O | -1.2629487 | 0.0000000  | -0.9803762 |
| N | 0.0000000  | 0.0000000  | 1.7646490  |
| C | 0.0000000  | 0.0000000  | 2.9467721  |

[2a...Cl]<sup>2-</sup>

|   |            |            |            |
|---|------------|------------|------------|
| C | 5.2933116  | -3.4280055 | 0.0381992  |
| C | 6.6437275  | -3.0356807 | 0.1066072  |
| C | 7.0239370  | -1.6960022 | 0.1261869  |
| C | 6.0127315  | -0.7227945 | 0.1008350  |
| C | 4.6514049  | -1.1216761 | 0.0610498  |
| C | 4.2652258  | -2.4726165 | 0.0013873  |
| C | 6.0127315  | 0.7227945  | 0.1008350  |
| C | 4.6514049  | 1.1216761  | 0.0610498  |
| N | 3.8365368  | 0.0000000  | 0.0340725  |
| C | 7.0239370  | 1.6960022  | 0.1261869  |
| C | 6.6437275  | 3.0356807  | 0.1066072  |
| C | 5.2933116  | 3.4280055  | 0.0381992  |
| C | 4.2652258  | 2.4726165  | 0.0013873  |
| N | 2.9032498  | 2.7448374  | -0.1266534 |
| C | 2.2885779  | 3.9639333  | 0.1005728  |
| O | 2.8783921  | 4.9855214  | 0.4587348  |
| N | 0.9254741  | 3.8867068  | -0.1266534 |
| H | 5.0248133  | -4.4798329 | 0.0153858  |
| H | 7.4077688  | -3.8156976 | 0.1325939  |
| H | 8.0753538  | -1.4057996 | 0.1629947  |
| H | 2.8369195  | 0.0000000  | 0.2669628  |
| H | 8.0753538  | 1.4057996  | 0.1629947  |
| H | 7.4077688  | 3.8156976  | 0.1325939  |
| H | 5.0248133  | 4.4798329  | 0.0153858  |
| H | 2.2937054  | 1.9667710  | -0.4056502 |
| H | 0.5564210  | 2.9697927  | -0.4056502 |
| C | 0.3220840  | 6.2981451  | 0.0381992  |
| C | -0.6928871 | 7.2714772  | 0.1066072  |
| C | -2.0431876 | 6.9309090  | 0.1261869  |
| C | -2.3804073 | 5.5685755  | 0.1008350  |
| C | -1.3543025 | 4.5890729  | 0.0610498  |
| C | 0.0087358  | 4.9301022  | 0.0013873  |
| C | -3.6323242 | 4.8457810  | 0.1008350  |
| C | -3.2971024 | 3.4673968  | 0.0610498  |
| N | -1.9182684 | 3.3225384  | 0.0340725  |
| C | -4.9807495 | 5.2349068  | 0.1261869  |
| C | -5.9508404 | 4.2357965  | 0.1066072  |
| C | -5.6153957 | 2.8701396  | 0.0381992  |
| C | -4.2739616 | 2.4574856  | 0.0013873  |
| N | -3.8287239 | 1.1418694  | -0.1266534 |
| C | -4.5771559 | 0.0000000  | 0.1005728  |

|    |            |            |            |
|----|------------|------------|------------|
| O  | -5.7567843 | 0.0000000  | 0.4587348  |
| N  | -3.8287239 | -1.1418694 | -0.1266534 |
| H  | 1.3672424  | 6.5915324  | 0.0153858  |
| H  | -0.3993934 | 8.3231648  | 0.1325939  |
| H  | -2.8202187 | 7.6963614  | 0.1629947  |
| H  | -1.4184598 | 2.4568444  | 0.2669628  |
| H  | -5.2551351 | 6.2905618  | 0.1629947  |
| H  | -7.0083755 | 4.5074672  | 0.1325939  |
| H  | -6.3920557 | 2.1116995  | 0.0153858  |
| H  | -2.8501264 | 1.0030217  | -0.4056502 |
| H  | -2.8501264 | -1.0030217 | -0.4056502 |
| C  | -5.6153957 | -2.8701396 | 0.0381992  |
| C  | -5.9508404 | -4.2357965 | 0.1066072  |
| C  | -4.9807495 | -5.2349068 | 0.1261869  |
| C  | -3.6323242 | -4.8457810 | 0.1008350  |
| C  | -3.2971024 | -3.4673968 | 0.0610498  |
| C  | -4.2739616 | -2.4574856 | 0.0013873  |
| C  | -2.3804073 | -5.5685755 | 0.1008350  |
| C  | -1.3543025 | -4.5890729 | 0.0610498  |
| N  | -1.9182684 | -3.3225384 | 0.0340725  |
| C  | -2.0431876 | -6.9309090 | 0.1261869  |
| C  | -0.6928871 | -7.2714772 | 0.1066072  |
| C  | 0.3220840  | -6.2981451 | 0.0381992  |
| C  | 0.0087358  | -4.9301022 | 0.0013873  |
| N  | 0.9254741  | -3.8867068 | -0.1266534 |
| C  | 2.2885779  | -3.9639333 | 0.1005728  |
| O  | 2.8783921  | -4.9855214 | 0.4587348  |
| N  | 2.9032498  | -2.7448374 | -0.1266534 |
| H  | -6.3920557 | -2.1116995 | 0.0153858  |
| H  | -7.0083755 | -4.5074672 | 0.1325939  |
| H  | -5.2551351 | -6.2905618 | 0.1629947  |
| H  | -1.4184598 | -2.4568444 | 0.2669628  |
| H  | -2.8202187 | -7.6963614 | 0.1629947  |
| H  | -0.3993934 | -8.3231648 | 0.1325939  |
| H  | 1.3672424  | -6.5915324 | 0.0153858  |
| H  | 0.5564210  | -2.9697927 | -0.4056502 |
| H  | 2.2937054  | -1.9667710 | -0.4056502 |
| N  | 0.0000000  | 0.0000000  | -1.3632214 |
| O  | 0.6331236  | 1.0966023  | -1.3763713 |
| O  | 0.6331236  | -1.0966023 | -1.3763713 |
| O  | -1.2662473 | 0.0000000  | -1.3763713 |
| Cl | -0.0000000 | 0.0000000  | 1.6336888  |

[2a...BF<sub>4</sub>]<sup>2-</sup>

|   |            |           |            |
|---|------------|-----------|------------|
| C | -5.3372935 | 3.4331985 | -0.1625430 |
| C | -6.6854171 | 3.0283598 | -0.1660289 |
| C | -7.0525071 | 1.6861053 | -0.1775403 |

|   |            |            |            |
|---|------------|------------|------------|
| C | -6.0315562 | 0.7228163  | -0.1779596 |
| C | -4.6719432 | 1.1295249  | -0.1725583 |
| C | -4.2968088 | 2.4909868  | -0.1696040 |
| C | -6.0315562 | -0.7228163 | -0.1779596 |
| C | -4.6719432 | -1.1295249 | -0.1725583 |
| N | -3.8633198 | 0.0000000  | -0.1882881 |
| C | -7.0525071 | -1.6861053 | -0.1775403 |
| C | -6.6854171 | -3.0283598 | -0.1660289 |
| C | -5.3372935 | -3.4331985 | -0.1625430 |
| C | -4.2968088 | -2.4909868 | -0.1696040 |
| N | -2.9336606 | -2.7936869 | -0.1821879 |
| C | -2.3363075 | -4.0466033 | -0.1233067 |
| O | -2.9504289 | -5.1102928 | -0.0378336 |
| N | -0.9525735 | -3.9374680 | -0.1821879 |
| H | -5.0768190 | 4.4871964  | -0.1491771 |
| H | -7.4565559 | 3.8014114  | -0.1588062 |
| H | -8.1010561 | 1.3843591  | -0.1789835 |
| H | -2.8517569 | 0.0000000  | -0.0678893 |
| H | -8.1010561 | -1.3843591 | -0.1789835 |
| H | -7.4565559 | -3.8014114 | -0.1588062 |
| H | -5.0768190 | -4.4871964 | -0.1491771 |
| H | -2.2937395 | -2.0012225 | -0.2689990 |
| H | -0.5862398 | -2.9870480 | -0.2689990 |
| C | -0.3045903 | -6.3388310 | -0.1625430 |
| C | 0.7200720  | -7.3039209 | -0.1660289 |
| C | 2.0660435  | -6.9507029 | -0.1775403 |
| C | 2.3898009  | -5.5848890 | -0.1779596 |
| C | 1.3577743  | -4.6107839 | -0.1725583 |
| C | -0.0088534 | -4.9666389 | -0.1696040 |
| C | 3.6417553  | -4.8620728 | -0.1779596 |
| C | 3.3141689  | -3.4812590 | -0.1725583 |
| N | 1.9316599  | -3.3457331 | -0.1882881 |
| C | 4.9864635  | -5.2645976 | -0.1775403 |
| C | 5.9653451  | -4.2755611 | -0.1660289 |
| C | 5.6418839  | -2.9056325 | -0.1625430 |
| C | 4.3056622  | -2.4756522 | -0.1696040 |
| N | 3.8862341  | -1.1437812 | -0.1821879 |
| C | 4.6726150  | 0.0000000  | -0.1233067 |
| O | 5.9008578  | 0.0000000  | -0.0378336 |
| N | 3.8862341  | 1.1437812  | -0.1821879 |
| H | -1.3476165 | -6.6402524 | -0.1491771 |
| H | 0.4361591  | -8.3582725 | -0.1588062 |
| H | 2.8516380  | -7.7078999 | -0.1789835 |
| H | 1.4258785  | -2.4696939 | -0.0678893 |
| H | 5.2494182  | -6.3235409 | -0.1789835 |
| H | 7.0203968  | -4.5568611 | -0.1588062 |
| H | 6.4244356  | -2.1530561 | -0.1491771 |

|   |            |            |            |
|---|------------|------------|------------|
| H | 2.8799793  | -0.9858254 | -0.2689990 |
| H | 2.8799793  | 0.9858254  | -0.2689990 |
| C | 5.6418839  | 2.9056325  | -0.1625430 |
| C | 5.9653451  | 4.2755611  | -0.1660289 |
| C | 4.9864635  | 5.2645976  | -0.1775403 |
| C | 3.6417553  | 4.8620728  | -0.1779596 |
| C | 3.3141689  | 3.4812590  | -0.1725583 |
| C | 4.3056622  | 2.4756522  | -0.1696040 |
| C | 2.3898009  | 5.5848890  | -0.1779596 |
| C | 1.3577743  | 4.6107839  | -0.1725583 |
| N | 1.9316599  | 3.3457331  | -0.1882881 |
| C | 2.0660435  | 6.9507029  | -0.1775403 |
| C | 0.7200720  | 7.3039209  | -0.1660289 |
| C | -0.3045903 | 6.3388310  | -0.1625430 |
| C | -0.0088534 | 4.9666389  | -0.1696040 |
| N | -0.9525735 | 3.9374680  | -0.1821879 |
| C | -2.3363075 | 4.0466033  | -0.1233067 |
| O | -2.9504289 | 5.1102928  | -0.0378336 |
| N | -2.9336606 | 2.7936869  | -0.1821879 |
| H | 6.4244356  | 2.1530561  | -0.1491771 |
| H | 7.0203968  | 4.5568611  | -0.1588062 |
| H | 5.2494182  | 6.3235409  | -0.1789835 |
| H | 1.4258785  | 2.4696939  | -0.0678893 |
| H | 2.8516380  | 7.7078999  | -0.1789835 |
| H | 0.4361591  | 8.3582725  | -0.1588062 |
| H | -1.3476165 | 6.6402524  | -0.1491771 |
| H | -0.5862398 | 2.9870480  | -0.2689990 |
| H | -2.2937395 | 2.0012225  | -0.2689990 |
| N | 0.0000000  | 0.0000000  | -0.7821148 |
| O | -0.6307536 | -1.0924972 | -0.7994709 |
| O | -0.6307536 | 1.0924972  | -0.7994709 |
| O | 1.2615071  | 0.0000000  | -0.7994709 |
| F | 1.3417083  | 0.0000000  | 3.7121071  |
| F | -0.6708542 | 1.1619535  | 3.7121071  |
| F | -0.6708542 | -1.1619535 | 3.7121071  |
| F | 0.0000000  | 0.0000000  | 1.8216976  |
| B | -0.0000000 | 0.0000000  | 3.2607830  |

#### **EVIKEA (selected fragments)**

|    |            |            |             |
|----|------------|------------|-------------|
| N  | 2.44500000 | 5.65400000 | 4.60400000  |
| O  | 3.09600000 | 4.61900000 | 4.76100000  |
| O  | 2.84000000 | 6.74600000 | 5.06900000  |
| O  | 1.36000000 | 5.64500000 | 3.96800000  |
| Br | 3.75500000 | 6.74500000 | 1.69000000  |
| N  | 3.92500000 | 2.42200000 | -2.79800000 |
| H  | 3.53700000 | 3.18300000 | -2.48500000 |

|   |            |            |             |
|---|------------|------------|-------------|
| N | 7.97700000 | 4.09900000 | -1.62100000 |
| H | 8.79500000 | 4.28300000 | -1.81500000 |
| C | 4.50300000 | 2.73100000 | -4.13700000 |
| H | 3.80100000 | 3.00200000 | -4.73400000 |
| H | 4.93500000 | 1.94800000 | -4.48700000 |
| H | 5.14400000 | 3.44000000 | -4.05300000 |
| C | 2.85800000 | 1.38600000 | -2.91200000 |
| H | 2.19700000 | 1.67600000 | -3.54400000 |
| H | 2.44600000 | 1.25600000 | -2.05400000 |
| H | 3.24600000 | 0.56000000 | -3.20900000 |
| C | 4.97800000 | 1.99500000 | -1.78800000 |
| H | 4.54200000 | 1.79500000 | -0.94400000 |
| H | 5.40400000 | 1.18100000 | -2.10000000 |
| C | 6.02100000 | 3.02600000 | -1.55900000 |
| C | 7.30400000 | 3.01700000 | -2.05300000 |
| H | 7.65500000 | 2.35800000 | -2.60700000 |
| C | 7.16000000 | 4.86500000 | -0.82200000 |
| C | 7.39200000 | 6.08000000 | -0.19200000 |
| H | 8.21400000 | 6.50800000 | -0.26800000 |
| C | 6.36900000 | 6.63900000 | 0.55300000  |
| H | 6.49700000 | 7.45000000 | 0.98900000  |
| C | 5.13200000 | 5.96600000 | 0.64500000  |
| C | 4.87900000 | 4.76500000 | 0.01600000  |
| H | 4.05700000 | 4.33900000 | 0.09900000  |
| C | 5.91300000 | 4.21200000 | -0.75400000 |

**ORUHOZ (selected fragments)**

|    |            |            |             |
|----|------------|------------|-------------|
| O  | 4.24700000 | 1.83700000 | 10.60000000 |
| O  | 4.35800000 | 2.86100000 | 8.69500000  |
| O  | 6.16700000 | 2.49600000 | 9.83400000  |
| N  | 4.92500000 | 2.39000000 | 9.71700000  |
| Ag | 6.34000000 | 5.40300000 | 15.93400000 |
| Cl | 4.37600000 | 5.40600000 | 10.48900000 |
| Cl | 3.98400000 | 8.63400000 | 11.72400000 |
| Cl | 9.02800000 | 2.41300000 | 20.13200000 |
| Cl | 8.77300000 | 5.69900000 | 21.18300000 |
| N  | 5.30100000 | 5.25800000 | 13.01900000 |
| N  | 5.02400000 | 7.24000000 | 13.81800000 |
| N  | 7.76200000 | 3.66500000 | 18.08400000 |
| N  | 7.60600000 | 5.70800000 | 18.72900000 |
| C  | 5.47600000 | 6.00400000 | 14.14100000 |
| C  | 4.75100000 | 6.02300000 | 12.01900000 |
| C  | 4.59200000 | 7.25400000 | 12.50700000 |
| C  | 5.68600000 | 3.84800000 | 12.90400000 |
| H  | 6.18200000 | 3.57800000 | 13.70400000 |
| H  | 4.88100000 | 3.29600000 | 12.81600000 |
| H  | 6.25200000 | 3.72900000 | 12.11300000 |
| C  | 4.98900000 | 8.38000000 | 14.72800000 |
| H  | 5.35900000 | 8.11700000 | 15.59600000 |
| H  | 5.52300000 | 9.11200000 | 14.35500000 |
| H  | 4.06300000 | 8.67800000 | 14.84300000 |
| C  | 7.30900000 | 4.87600000 | 17.70100000 |
| C  | 8.34800000 | 3.74400000 | 19.31900000 |
| C  | 8.25000000 | 5.01000000 | 19.72900000 |
| C  | 7.72500000 | 2.46100000 | 17.24700000 |
| H  | 7.18100000 | 2.63300000 | 16.45000000 |
| H  | 8.63700000 | 2.22300000 | 16.97600000 |
| H  | 7.33300000 | 1.72100000 | 17.75700000 |
| C  | 7.33000000 | 7.15100000 | 18.73200000 |
| H  | 6.42300000 | 7.31000000 | 18.39700000 |
| H  | 7.40700000 | 7.49800000 | 19.64500000 |
| H  | 7.97600000 | 7.60800000 | 18.15300000 |



**BIDHAX (selected fragments)**

|   |            |             |             |
|---|------------|-------------|-------------|
| S | 4.41300000 | 1.17300000  | 7.68600000  |
| C | 3.51700000 | 2.31400000  | 6.64300000  |
| N | 2.51500000 | 3.02500000  | 7.07300000  |
| N | 3.95400000 | 2.36900000  | 5.40900000  |
| H | 2.27800000 | 2.99400000  | 7.90700000  |
| H | 2.09000000 | 3.58600000  | 6.55100000  |
| H | 3.50100000 | 2.87200000  | 4.77400000  |
| H | 4.60100000 | 1.89000000  | 5.24100000  |
| S | 3.34600000 | 1.17300000  | 9.40300000  |
| C | 4.24200000 | 2.31400000  | 10.44600000 |
| N | 5.24400000 | 3.02500000  | 10.01600000 |
| N | 3.80600000 | 2.36900000  | 11.68000000 |
| H | 5.48100000 | 2.99400000  | 9.18200000  |
| H | 5.66900000 | 3.58600000  | 10.53800000 |
| H | 4.25800000 | 2.87200000  | 12.31500000 |
| H | 3.15800000 | 1.89000000  | 11.84800000 |
| N | 1.90900000 | -0.93500000 | 7.10000000  |
| O | 2.43500000 | -1.77300000 | 7.83900000  |
| O | 0.90700000 | -0.27200000 | 7.48500000  |
| O | 2.37600000 | -0.71600000 | 5.94800000  |
| N | 6.30700000 | 4.99200000  | 12.79600000 |
| O | 6.83300000 | 5.82900000  | 13.53600000 |
| O | 5.30500000 | 4.32800000  | 13.18100000 |
| O | 6.77400000 | 4.77200000  | 11.64400000 |

**3EZH (selected fragments)**

|   |             |             |             |
|---|-------------|-------------|-------------|
| C | 0.75558200  | -3.02419100 | -1.39638900 |
| C | -0.09398300 | -2.99698400 | -0.14907800 |
| O | 0.38428300  | -2.71896600 | 0.95068300  |
| N | -1.38596700 | -3.28989600 | -0.27744200 |
| C | -2.22249700 | -3.23859200 | 0.90758500  |
| N | 3.35037000  | -1.30083100 | 0.58474500  |
| C | 3.71711400  | -0.63272700 | -0.51014400 |
| N | 4.99608300  | -0.64909100 | -0.95998300 |
| N | 2.77046700  | 0.04515400  | -1.17086900 |
| C | -0.68347700 | 2.93629700  | -1.39494800 |
| C | 0.18664000  | 3.00036100  | -0.14621000 |
| O | -0.27378000 | 2.73287200  | 0.94135200  |
| N | 1.45956700  | 3.34130500  | -0.30619800 |
| C | 2.32096400  | 3.35489000  | 0.86929400  |
| N | -3.42488200 | 1.31006300  | 0.59313300  |
| C | -3.80710900 | 0.64032100  | -0.49578500 |
| N | -5.09696100 | 0.72725200  | -0.94499700 |

|   |             |             |             |
|---|-------------|-------------|-------------|
| N | -2.89038500 | -0.08484500 | -1.15927200 |
| N | 0.02937300  | -0.04981600 | 1.13379500  |
| O | -1.01282100 | -0.21075100 | 1.79668600  |
| O | 1.01583200  | 0.20171900  | 1.75564000  |
| O | -0.03678600 | -0.13447700 | -0.09291300 |
| H | 1.58348600  | -2.37178800 | -1.21241400 |
| H | 0.92733500  | -4.05580600 | -1.62259700 |
| H | -2.88811300 | -2.41945100 | 0.73190500  |
| H | 2.39162700  | -1.24062700 | 0.86256900  |
| H | 5.24290800  | -0.13886000 | -1.78384100 |
| H | 5.69254100  | -1.17139200 | -0.46789700 |
| H | 3.00671400  | 0.55816300  | -1.99610200 |
| H | 1.82710200  | 0.03850300  | -0.83917900 |
| H | -0.03711200 | 2.68308300  | -2.20919300 |
| H | -1.51726500 | 2.30872500  | -1.15862100 |
| H | 1.78048000  | 2.82764900  | 1.62744600  |
| H | -2.47849300 | 1.20985800  | 0.90022900  |
| H | -3.15354400 | -0.59511400 | -1.97803500 |
| H | -1.94516300 | -0.11411600 | -0.83415600 |
| H | -5.37704100 | 0.22279000  | -1.76174300 |
| H | -5.75934200 | 1.29523200  | -0.45647900 |
| H | 2.50707500  | 4.33020300  | 1.26807700  |
| H | 3.24455500  | 2.85512900  | 0.66406600  |
| H | 3.96026300  | -1.85720700 | 1.14908200  |
| H | 0.22851500  | -2.61507800 | -2.23288600 |
| H | -1.69559700 | -3.01320000 | 1.81117500  |
| H | -2.78634800 | -4.13961200 | 1.03060200  |
| H | -1.07820900 | 3.90846200  | -1.60466700 |
| H | -4.03072200 | 1.90647700  | 1.11967600  |
| H | -1.77007200 | -3.53867200 | -1.16658400 |
| H | 1.81752000  | 3.58215700  | -1.20834000 |
